# Supplementary material for: Faecal calprotectin and rectal histological inflammatory markers in cystic fibrosis: a single-centre study
Source: PubMed Central journal article supplement — BMJ Paediatr Open. 2022 Apr 28;6(1):e001422. doi: 10.1136/bmjpo-2022-001422 (PMC9058793; doi:10.1136/bmjpo-2022-001422), 2022-04-28
Supplement: bmjpo-2022-001422.draft_revisions.pdf [file bmjpo-2022-001422.draft_revisions.pdf]

# BMJ Paediatrics Open

BMJ Paediatrics Open is committed to open peer review. As part of this commitment we make the peer review history of every article we publish publicly available.

When an article is published we post the peer reviewers' comments and the authors' responses online. We also post the versions of the paper that were used during peer review. These are the versions that the peer review comments apply to.

The versions of the paper that follow are the versions that were submitted during the peer review process. They are not the versions of record or the final published versions. They should not be cited or distributed as the published version of this manuscript.

BMJ Paediatrics Open is an open access journal and the full, final, typeset and author-corrected version of record of the manuscript is available on our site with no access controls, subscription charges or pay-per-view fees (<http://bmjpaedsopen.bmj.com>).

If you have any questions on BMJ Paediatrics Open's open peer review process please email [info.bmjpo@bmj.com](mailto:info.bmjpo@bmj.com)

# BMJ Paediatrics Open

## Fecal calprotectin and rectal histologic inflammatory markers in cystic fibrosis

|                               |                                                                                                                                                                                                                                                                                                                                                                                                                                                                                                                                                                                                                                                                                                                                                                                                                                                                                                                                                                                                                                                                                                                                                                                                                                                             |
|-------------------------------|-------------------------------------------------------------------------------------------------------------------------------------------------------------------------------------------------------------------------------------------------------------------------------------------------------------------------------------------------------------------------------------------------------------------------------------------------------------------------------------------------------------------------------------------------------------------------------------------------------------------------------------------------------------------------------------------------------------------------------------------------------------------------------------------------------------------------------------------------------------------------------------------------------------------------------------------------------------------------------------------------------------------------------------------------------------------------------------------------------------------------------------------------------------------------------------------------------------------------------------------------------------|
| Journal:                      | <i>BMJ Paediatrics Open</i>                                                                                                                                                                                                                                                                                                                                                                                                                                                                                                                                                                                                                                                                                                                                                                                                                                                                                                                                                                                                                                                                                                                                                                                                                                 |
| Manuscript ID                 | bmjpo-2022-001422                                                                                                                                                                                                                                                                                                                                                                                                                                                                                                                                                                                                                                                                                                                                                                                                                                                                                                                                                                                                                                                                                                                                                                                                                                           |
| Article Type:                 | Original research                                                                                                                                                                                                                                                                                                                                                                                                                                                                                                                                                                                                                                                                                                                                                                                                                                                                                                                                                                                                                                                                                                                                                                                                                                           |
| Date Submitted by the Author: | 18-Jan-2022                                                                                                                                                                                                                                                                                                                                                                                                                                                                                                                                                                                                                                                                                                                                                                                                                                                                                                                                                                                                                                                                                                                                                                                                                                                 |
| Complete List of Authors:     | <p>Roda, Juliana; Centro Hospitalar e Universitario de Coimbra EPE Hospital Pediátrico de Coimbra, Pediatric Gastroenterology and Nutrition Unit; Universidade de Coimbra Faculdade de Medicina, Clínica Universitária de Pediatria</p> <p>Maia, Carla; Centro Hospitalar e Universitario de Coimbra EPE Hospital Pediátrico de Coimbra, Pediatric Gastroenterology and Nutrition Unit</p> <p>Almeida, Susana; Centro Hospitalar e Universitario de Coimbra EPE Hospital Pediátrico de Coimbra, Pediatric Gastroenterology and Nutrition Unit</p> <p>Oliveira, Rui ; Centro Hospitalar e Universitário de Coimbra EPE, Pathology Department; Universidade de Coimbra Faculdade de Medicina, Coimbra Institute for Clinical and Biomedical Research (iCBR) Area of Environment Genetics and Oncobiology (CIMAGO)</p> <p>Ferreira, Ricardo; Centro Hospitalar e Universitario de Coimbra EPE Hospital Pediátrico de Coimbra, Pediatric Gastroenterology and Nutrition Unit</p> <p>Oliveira, Guiomar; Centro Hospitalar e Universitario de Coimbra EPE Hospital Pediátrico de Coimbra, Centro de Desenvolvimento da Criança e Centro de Investigação e Formação Clínica; Universidade de Coimbra Faculdade de Medicina, Clínica Universitária de Pediatria</p> |
| Keywords:                     | Cystic Fibrosis, Gastroenterology                                                                                                                                                                                                                                                                                                                                                                                                                                                                                                                                                                                                                                                                                                                                                                                                                                                                                                                                                                                                                                                                                                                                                                                                                           |
|                               |                                                                                                                                                                                                                                                                                                                                                                                                                                                                                                                                                                                                                                                                                                                                                                                                                                                                                                                                                                                                                                                                                                                                                                                                                                                             |

SCHOLARONE™  
Manuscripts

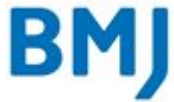

I, the Submitting Author has the right to grant and does grant on behalf of all authors of the Work (as defined in the below author licence), an exclusive licence and/or a non-exclusive licence for contributions from authors who are: i) UK Crown employees; ii) where BMJ has agreed a CC-BY licence shall apply, and/or iii) in accordance with the terms applicable for US Federal Government officers or employees acting as part of their official duties; on a worldwide, perpetual, irrevocable, royalty-free basis to BMJ Publishing Group Ltd ("BMJ") its licensees and where the relevant Journal is co-owned by BMJ to the co-owners of the Journal, to publish the Work in this journal and any other BMJ products and to exploit all rights, as set out in our [licence](#).

The Submitting Author accepts and understands that any supply made under these terms is made by BMJ to the Submitting Author unless you are acting as an employee on behalf of your employer or a postgraduate student of an affiliated institution which is paying any applicable article publishing charge ("APC") for Open Access articles. Where the Submitting Author wishes to make the Work available on an Open Access basis (and intends to pay the relevant APC), the terms of reuse of such Open Access shall be governed by a Creative Commons licence – details of these licences and which [Creative Commons](#) licence will apply to this Work are set out in our licence referred to above.

Other than as permitted in any relevant BMJ Author's Self Archiving Policies, I confirm this Work has not been accepted for publication elsewhere, is not being considered for publication elsewhere and does not duplicate material already published. I confirm all authors consent to publication of this Work and authorise the granting of this licence.

1  
2  
3 **Title: Fecal calprotectin and rectal histologic inflammatory markers in cystic fibrosis**  
4  
5

6 **Authors:**  
7

8 **Corresponding author:**  
9

10 **Juliana Roda**

11 **MD**

12  
13  
14  
15 Pediatric Gastroenterology and Nutrition Unit, Hospital Pediátrico - Centro Hospitalar e

16  
17  
18 Universitário de Coimbra, Coimbra, Portugal

19  
20 Avenida Afonso Romão, 3000-602 Coimbra, Portugal

21  
22 Telephone: +351 962748392

23  
24 Email: [juroda@hotmail.com](mailto:juroda@hotmail.com)

25  
26  
27 <https://orcid.org/0000-0001-8990-779X>  
28  
29  
30

31 **Carla Maia**

32 **MD**

33  
34  
35 Pediatric Gastroenterology and Nutrition Unit, Hospital Pediátrico - Centro Hospitalar e

36  
37  
38 Universitário de Coimbra, Coimbra, Portugal

39  
40 Email: [carla.maia@chuc.min-saude.pt](mailto:carla.maia@chuc.min-saude.pt)  
41  
42  
43  
44

45 **Susana Almeida**

46 **MD**

47  
48  
49 Pediatric Gastroenterology and Nutrition Unit, Hospital Pediátrico - Centro Hospitalar e

50  
51  
52 Universitário de Coimbra, Coimbra, Portugal

53  
54 Email: [susana.almeida.coimbra@gmail.com](mailto:susana.almeida.coimbra@gmail.com)  
55  
56  
57  
58  
59  
60

**Rui Caetano Oliveira****MD, PhD**

Pathology Department, Centro Hospitalar e Universitário de Coimbra, Portugal; Biophysics Institute, Faculty of Medicine, University of Coimbra, 3000-548, Portugal  
Coimbra Institute for Clinical and Biomedical Research (iCBR) Area of Environment Genetics and Oncobiology (CIMAGO), Faculty of Medicine, University of Coimbra, 3000-548, Coimbra, Portugal

Email: ruipedrocoliveira@hotmail.com

**Ricardo Ferreira****MD**

Pediatric Gastroenterology and Nutrition Unit, Hospital Pediátrico - Centro Hospitalar e Universitário de Coimbra, Coimbra, Portugal

Email: ricardo.ferreira@chuc.min-saude.pt

**Guiomar Oliveira****MD, PhD**

Centro de Desenvolvimento da Criança e Centro de Investigação e Formação Clínica, Hospital Pediátrico – Centro Hospitalar e Universitário de Coimbra, Coimbra, Portugal  
Clínica Universitária de Pediatria, Faculdade de Medicina da Universidade de Coimbra, Coimbra, Portugal

Email: guiomar@chuc.min-saude.pt

<https://orcid.org/0000-0002-7049-1277>

**Word count:** 2453 words

**ABSTRACT**

Objective: To analyze the association of fecal calprotectin with the genetic and clinical characteristics of pediatric patients with cystic fibrosis (PwCF). In a subset of these patients, we aimed to associate histologic inflammatory features of rectal mucosa to fecal calprotectin levels.

Methods: In a prospective study, fecal calprotectin levels were collected in all 23 PwCF attending our pediatric center, together with demographic and clinical data. Associations between fecal calprotectin and clinical features were determined. In 11 of these patients, endoscopic rectal biopsies were obtained and the association between fecal calprotectin and histologic inflammatory markers was analyzed.

Results: Median age of PwCF was 12 years, 19 had pancreatic insufficiency (PI) (19/23). Seventeen (17/23) had elevated fecal calprotectin, and the median value was 88  $\mu\text{g/g}$  (IQR=178  $\mu\text{g/g}$ ). Higher fecal calprotectin levels were observed in the PI group (101 vs 30  $\mu\text{g/g}$ ,  $P=0.027$ ). No significant correlation between elevated fecal calprotectin level and BMI z-score was found. Five patients (22%) reported abdominal pain, three (13%) complained of diarrhea and three (13%) had constipation, but these symptoms were not associated with elevated fecal calprotectin.

Unspecific focal rectal inflammation was found in four patients (4/11). An association between rectal mucosa inflammation and elevated fecal calprotectin was found ( $p=0.015$ ).

Conclusions: In our PwCF, elevated fecal calprotectin was frequent, particularly if PI, and it was not related to gastrointestinal symptoms or malnutrition. Elevated fecal calprotectin was present in patients with histologic evidence of rectal inflammation. Fecal calprotectin may be a good indicator of asymptomatic rectal inflammation in PwCF.

**Keywords:** intestinal inflammation, rectal biopsies, pancreatic insufficiency

**List of abbreviations:**

BMI - Body mass index

CF - Cystic fibrosis

CFTR - Cystic Fibrosis Transmembrane conductance Regulator

IQR – Interquartile range

PERT - pancreatic enzyme replacement therapy

PI - Pancreatic insufficiency

PS - pancreatic sufficient

Confidential: For Review Only

## BACKGROUND

Cystic fibrosis (CF) is a severe autosomal recessive disease that results from mutations in a gene encoding the cystic fibrosis transmembrane conductance regulator (CFTR) protein, a chloride channel [1]. It is the most common life-limiting genetic disease among Caucasians, occurring in 1 of 2500 live births worldwide. In Portugal, a prevalence of 0.27 per 10,000 inhabitants and an incidence of 1 per 7500 newborns have been estimated [2, 3].

CF is also the most common cause of pancreatic insufficiency (PI) in children [4]. Historically, CF children died in infancy from severe malnutrition and later from respiratory failure, but due to improved clinical care, including pancreatic enzyme replacement therapy (PERT), currently, a majority of them reach adulthood [5]. Approximately 85% of CF patients have impaired digestion due to PI and despite adequate PERT, several CF patients still have malabsorption, growth impairment and gastrointestinal problems, including abdominal pain, steatorrhea, and altered motility [4, 5]. It has been suggested that digestive symptoms are attributable not only to PI but also to intestinal inflammation. However, the pathogenesis and nutritional implications of this finding remains unclear [5].

Studies, in both animals and humans, have reported evidence of intestinal inflammation in CF. In the mouse model of CF, the most common manifestation is intestinal obstruction resulting from inflammatory enteropathy, leading to perforation [6]. Furthermore, abnormal mucus accumulation in the intestines of murine models predisposes them to gut dysmotility, creating a niche for bacterial overgrowth and dysbiosis [7].

In humans, the presence of inflammatory biomarkers, including fecal calprotectin, eosinophil cationic protein, interleukin-1B and interleukin-8, was reported, suggesting that intestinal inflammation is a feature of CF [5, 8]. Videocapsule endoscopic studies elicited mucosal ulceration, erythema and mucosal breaks in the small bowel of CF patients, particularly those with PI [4]. Calprotectin is a neutrophil secretory product, and elevated fecal levels are well correlated with colonic inflammation in inflammatory bowel disease [9–11]. Dysbiosis may be



1  
2  
3 associated with intestinal inflammation as reflected by increased levels of fecal calprotectin  
4  
5 that respond to antibiotic treatment [12]. CFTR modulators may potentially improve dysbiosis  
6  
7 and inflammation, for example ivacaftor has been associated with a decrease in calprotectin  
8  
9 levels[13].  
10

11  
12 However, to our knowledge, there are no studies characterizing intestinal histological  
13  
14 inflammatory findings in CF patients and, particularly, studies analysing the relationship  
15  
16 between elevated fecal calprotectin and these histologic inflammatory findings.  
17

18  
19 The aim of the present study was to analyze, in a cohort of pediatric CF patients, the  
20  
21 association between fecal calprotectin levels and genetic and clinical characteristics, including  
22  
23 nutritional status and gastrointestinal symptoms. In a subset of this cohort, we also aimed to  
24  
25 characterize histological inflammatory features of rectal mucosa and relate it to fecal  
26  
27 calprotectin levels.  
28

## 29 30 31 **METHODS**

32  
33 This prospective study included children and adolescents aged 0 to 18 years followed in the  
34  
35 Pediatric Unit of the Cystic Fibrosis Reference Centre of the Centro Hospitalar e Universitário  
36  
37 de Coimbra, Portugal, in the year 2019. The criteria for the diagnosis of CF were: clinical  
38  
39 characteristics compatible with CF, a positive sweat test and a genetic study with the  
40  
41 identification of two disease-causing mutations, according to the latest consensus [14]. All  
42  
43 patients willing to participate were included. Exclusion criteria included recent respiratory  
44  
45 exacerbation/infection or ingestion of steroids or nonsteroidal anti-inflammatory drugs, both  
46  
47 in the previous 4 weeks.  
48  
49

50  
51 In all participants, demographic data, genotype and clinical data, including nutritional status  
52  
53 and PERT medication, were collected at the time of the appointment where stool sample was  
54  
55 obtained. Nutritional status was assessed according to the z-score of weight, height, and body  
56  
57 mass index (BMI). Patients were asked whether they had experienced gastrointestinal  
58  
59  
60

1  
2  
3 symptoms (abdominal pain, constipation or diarrhea) in the two weeks preceding the  
4  
5 calprotectin measurement.  
6  
7

8 Exocrine pancreatic function was assessed using fecal elastase levels. PI was considered when  
9  
10 the fecal elastase level was under 200 µg/g; above that, they were classified as pancreatic  
11  
12 sufficient (PS).  
13  
14

### 17 **Fecal calprotectin measurement**

19 Stool samples were collected at home or at the CF Reference Centre. Calprotectin level in the  
20  
21 fecal samples were measured using EliA Calprotectin® (reagents from Thermo Fisher  
22  
23 Scientific®). Fecal calprotectin concentration was considered normal up to 50 µg/g stool, as  
24  
25 was considered in previous studies with CF patients [4] and as it has been shown to be  
26  
27 sensitive for detecting inflammation in children with inflammatory bowel disease [15].  
28  
29  
30  
31  
32

### 33 **Rectal biopsies**

35 Rectal biopsies were obtained, from patients already enrolled in another study from our  
36  
37 center, which aimed to test CFTR modulator responses in intestinal organoids from patients  
38  
39 with rarer mutations (data not yet published; *UID/MULTI/04046/2019*). As a consequence,  
40  
41 most of these patients had less common mutations. Time between fecal calprotectin  
42  
43 measurement and rectal biopsies was a maximum of two days.  
44  
45

46 Rectal mucosa specimens (3-4 mm in diameter) were obtained from eleven patients, with or  
47  
48 without sedation (depending on individuals will or collaboration) using a colonoscope and  
49  
50 colon forceps (Endoflex®, diameter 2.8 mm). Samples were immediately stored in formalin.  
51  
52

53 One pathologist with experience in gastrointestinal pathology from the Pathology Department,  
54  
55 Centro Hospitalar e Universitário de Coimbra, Portugal performed the histologic analysis.  
56  
57 Samples were blinded to the clinical information and were analyzed under an optical  
58  
59  
60

1  
2  
3 microscope (Nikon Eclipse 50i®). Pictures were taken with a Nikon-Digital Sight DS-Fi1® digital  
4  
5 camera.  
6

7 Since the diagnosis of CF is based mainly on bioelectrical/biochemical analyses, there are no  
8  
9 defined standard histological classification score. Therefore, the evaluation took into  
10  
11 consideration the density of mononucleated inflammatory population, on a semi quantitative  
12  
13 approach: none, mild, moderate and severe.  
14  
15

### 16 17 18 **Statistical Analysis**

19  
20 Statistical analyses were performed with SPSS software (v.19; SPSS Inc., Chicago, IL, USA), and  
21  
22 a p value < 0.05 was considered statistically significant. Descriptive statistics were presented  
23  
24 according to the normality of the data distribution using Shapiro-Wilk test. Spearman's  
25  
26 correlation coefficient, Mann-Whitney and Exact Fisher tests were used between patient  
27  
28 groups to evaluate correlation, differences and associations, respectively.  
29  
30  
31  
32  
33

### 34 **Ethics Approval**

35  
36 The present study was performed in accordance with the Declaration of Helsinki and approved  
37  
38 by the board of the Centro Hospitalar e Universitário de Coimbra (Portugal) after a favorable  
39  
40 report by the Health Ethics Committee (Ref. CHUC-080-16). Informed consent was obtained by  
41  
42 all participants aged over 16 years or by their parents or legal guardians if under 16 years old.  
43  
44  
45  
46  
47

### 48 **Patient involvement**

49  
50 Patients were not directly involved in setting the research question, the design or in the  
51  
52 implementation of the project.  
53  
54  
55  
56  
57  
58  
59  
60

## RESULTS

Fecal calprotectin was measured in all 23 PwCF followed in our center during one year. The median age was 12 years, aged from 2 months to 18 years old. Twelve were male. All patients with PI (19/23, 83%) were taking PERT. The F508del mutation was present in all patients in at least one allele. Fifteen (65%) patients were F508del homozygous, and the others carried one of the following mutations: R334W (n=3), 711+ 1G->T (n=2), and 2184insA (n=1), P5L (n=1) and a novel mutation, c.3321dup (n=1) (Table 1). Only two patients were taking CFTR modulator lumacaftor/ivacaftor (patient 15 and patient 20, presenting fecal calprotectin level of 347 and 142  $\mu\text{g/g}$ , respectively). Sweat test of these patients did not improve with modulator drug. Seventeen of the 23 patients (74%) had an elevated fecal calprotectin measurement, and the median value was 88  $\mu\text{g/g}$  (IQR=178  $\mu\text{g/g}$ ). Most patients (16/19) with PI had elevated fecal calprotectin (84%). The PI group had higher fecal calprotectin levels than in the PS group (101  $\mu\text{g/g}$ ; IQR=234 vs 30  $\mu\text{g/g}$ ; IQR=53;  $p=0.0027$ ).

A moderate positive correlation was found between fecal calprotectin and sweat test values (from the time of diagnosis) ( $r=0.46$ ;  $p=0.029$ ). No correlation was found between age and fecal calprotectin ( $r=-0.3$ ;  $p=0.14$ ). Also meconium ileus past history was not associated with elevated calprotectin (Table 2).

Comparing the median BMI z-score in patients with normal and elevated fecal calprotectin, no significant difference was found ( $-0.58 \text{ kg/m}^2$ ; IQR= 2.8 vs 0.1  $\text{kg/m}^2$ ; IQR=1.08;  $p=0.09$ ). No significant correlation between fecal calprotectin level and BMI z-score was found ( $r=0.19$ ;  $p=0.36$ ).

All 15 patients homozygous for the F508del mutation had elevated fecal calprotectin. These PwCF have a statistically significant higher fecal calprotectin than F508del heterozygous patients (110  $\mu\text{g/g}$ ; IQR=217 vs 40  $\mu\text{g/g}$ ; IQR=54,  $p=0.003$ ).

1  
2  
3 Some CF patients reported digestive symptoms: five patients (22%) reported abdominal pain,  
4 three (13%) complained of diarrhea, and three (13%) had constipation (Table 1).  
5  
6 Gastrointestinal symptoms were not associated with elevated fecal calprotectin (Table 2).  
7  
8  
9  
10

### 11 **Histologic features**

12  
13 Rectal biopsies were obtained from 11 of the 23 PwCF. Eight patients had the rarer mutations  
14 R334W (n=3), 711+1G-T (n=2), P5L (n=1), c.3321dup (n=1) and 2184insA (n=1), and three  
15  
16 patients were homozygous for the F508del mutation.  
17  
18

19  
20 Unspecific mild focal inflammation was found in the three F508del homozygous patients, all of  
21  
22 which had elevated fecal calprotectin (Table 1). Inflammatory features were characterized as  
23  
24 small lymphocyte and plasma cell infiltrates distributed in a vaguely nodular pattern between  
25  
26 colonic crypts (Figure 1 – B, C and D).  
27  
28

29  
30 Mild to moderate focal inflammation composed of plasma cells and small lymphocytes in the  
31  
32 mucosa was found in the patient carrying F508del in one allele and the new mutation  
33  
34 c.3321dup in the other allele (Figure 1 – A). This patient had significantly elevated fecal  
35  
36 calprotectin (341 µg/g) (patient 7; Table 1).  
37  
38

39  
40 There was an association between elevated fecal calprotectin levels and the presence of  
41  
42 inflammation in rectal biopsies (Table 3). Mean calprotectin was higher in PwCF with  
43  
44 histological inflammatory alterations comparing with PwCF with normal histology (143 µg/g;  
45  
46 IQR=249 vs 19 µg/g; IQR=30; p=0.024). None of the mucosal samples had architectural  
47  
48 changes, which are a major sign of chronic inflammation.  
49  
50

### 51 **DISCUSSION**

52  
53 Most patients from this study (78%) had an elevated fecal calprotectin level, some reaching a  
54  
55 maximum level of more than 300 µg/g. This is consistent with previous studies and suggests  
56  
57 the presence of intestinal inflammation in PwCF [4, 5, 16]. The pathophysiology of intestinal  
58  
59  
60

1  
2  
3 inflammation may be explained by the same triad of obstruction by mucus accumulation,  
4  
5 inflammation and infection that causes disease in the airways of PwCF [17]. The *CFTR* gene is  
6  
7 strongly expressed all along the intestinal tract in a cephalad-caudal gradient, *CFTR* messenger  
8  
9 RNA levels are highest in the duodenum and levels decrease distally along the small intestine  
10  
11 to the large intestine [17]. This “CF enteropathy” may be an independent entity in the disease  
12  
13 process or may be due to other factors. High doses of PERT can cause inflammation and  
14  
15 fibrosing colonopathy[18]. Inspissated intestinal secretions, mucus accumulation, constipation,  
16  
17 slow intestinal motility, the use of proton pump inhibitors and frequent courses of antibiotics  
18  
19 are multiple risk factors for small bowel bacterial overgrowth in CF patients, which can cause  
20  
21 inflammation, mucosal damage and aggravate maldigestion [16]. An unfavorable intestinal  
22  
23 microbiome may also be a stimulus for inflammation [19], and one trial with probiotics  
24  
25 supported this hypothesis, as the use of *Lactobacillus rhamnosus GG* reduced calprotectin  
26  
27 concentrations in CF children [19].  
28  
29  
30  
31

32  
33 In our study, lower fecal calprotectin levels were found in PS patients. Elevated fecal  
34  
35 calprotectin only in PI patients has also been reported by Dhaliwal *et al* [5]. On the other hand,  
36  
37 sixteen of nineteen patients with PI had elevated fecal calprotectin, and the difference in fecal  
38  
39 calprotectin levels between the PI and PS groups was impressive (101 vs 30 µg/g). This means  
40  
41 that either PI by itself or PERT may be responsible for intestinal inflammation in these  
42  
43 patients[18]. However, there has been reported a lack of correlation between PERT and fecal  
44  
45 calprotectin[20]. As reported by Dumoulin *et al.*, calprotectin is subject to proteolysis by tripsin  
46  
47 activity, which is virtually absent in PI PwCF. As a result, calprotectin proteolysis is also  
48  
49 reduced. Therefore, calprotectin levels detected in stools of PI patients may be higher, and this  
50  
51 may not be exclusively attributed to intestinal inflammation[21]. Perhaps, in PI PwCF, the  
52  
53 upper limit of the considered “normal” fecal calprotectin should be higher than the value  
54  
55 considered for inflammatory bowel disease, as no association was found with digestive  
56  
57 symptoms [21].  
58  
59  
60

1  
2  
3 Another interesting finding was that PwCF F508del homozygous have significantly higher  
4 calprotectin levels in comparison to heterozygotes. This genotype may be associated with an  
5 increased risk of more significant intestinal inflammation.  
6  
7  
8

9  
10 Overall, only a small number of patients complained of gastrointestinal symptoms, and no  
11 association between elevated calprotectin and digestive symptoms could be found. The same  
12 conclusion has been reported even in studies where digestive symptoms were much more  
13 frequent[20].  
14  
15  
16  
17

18  
19 In contrast to previous studies [5], no relationship could be found between fecal calprotectin  
20 and nutritional status or growth parameters. However, interestingly, a positive correlation was  
21 found between fecal calprotectin and sweat test values, which may be indicative of the  
22 presence of significant intestinal inflammation in patients with a more severe phenotype.  
23  
24  
25  
26

27  
28 Historically, distinct histological changes, which have been interpreted as signs of mucus  
29 hypersecretion, have been reported in light microscopic studies of large intestinal mucosa  
30 from CF patients. "Hypertrophic" or enlarged goblet cells and crypts distended by accumulated  
31 mucus were described, and these changes were considered useful in the diagnosis of CF by  
32 some authors [22]. However, to our knowledge, this is the first study to specifically look for  
33 histologic evidence of inflammation in CF patients and try to associate it to fecal calprotectin.  
34  
35  
36  
37  
38  
39

40  
41 Four out of the eleven patients to whom rectal biopsies were performed had histologic  
42 inflammatory alterations. Interestingly, all the three patients homozygous for F508del  
43 mutation had histological signs of inflammation and this may be related to the severe  
44 phenotype associated to this common mutation.  
45  
46  
47  
48  
49

50  
51 Elevated calprotectin level was associated with histologic inflammation in the rectal mucosa  
52 (Table 3) and PwCF with rectal inflammation had a significantly higher calprotectin level. This  
53 allows us to conclude that fecal calprotectin may be a good indicator of rectal inflammation in  
54 PwCF. However, the clinical meaning of this finding remains to be explained, as this did not  
55 translate into more frequent gastrointestinal symptoms or influenced nutritional status.  
56  
57  
58  
59  
60

1  
2  
3 We are aware that our study had several limitations: it is a small and unicentric study, and  
4  
5 biopsies were performed on a subset of our patients and limited to the rectum. Larger  
6  
7 multicenter studies with the aim of determining serial and longitudinal studies of calprotectin  
8  
9 levels and biopsies of the upper and lower gastrointestinal tract may help to determine clinical  
10  
11 relevance.

12  
13  
14 However, the finding of abnormal calprotectin levels and inflammatory alterations in the  
15  
16 intestinal mucosa in the pediatric population raises questions about the early detection of CF  
17  
18 enteropathy.

19  
20  
21 In conclusion, there is increasing evidence that intestinal inflammation is part of CF and is  
22  
23 present early in life, particularly in childhood and adolescence. The additional contribution of  
24  
25 low trypsin activity, chronic enzyme dosage, dysmotility, bacterial overgrowth, dysbiosis and  
26  
27 other unidentified factors may play a role in its multifactorial cause. Fecal calprotectin seems  
28  
29 to be an important noninvasive biomarker of intestinal inflammation in CF patients since a  
30  
31 relationship with histologic evidence of rectal mucosa inflammation was found. Further and  
32  
33 larger studies need to be performed to confirm and explain the mechanisms and clinical  
34  
35 relevance of these findings.  
36  
37  
38  
39  
40  
41  
42  
43  
44  
45  
46  
47  
48  
49  
50  
51  
52  
53  
54  
55  
56  
57  
58  
59  
60



1  
2  
3 **Ethics approval and consent to participate:** The present study was performed in accordance  
4 with the Declaration of Helsinki and approved by the board of the Centro Hospitalar e  
5 Universitário de Coimbra (Portugal) after a favorable report by the Health Ethics Committee  
6 (Ref. CHUC-080-16). Informed consent was obtained by all participants aged over 16 years or  
7 by their parents or legal guardians if under 16 years old.  
8  
9

10  
11  
12 **Consent for publication:** Informed consent for publication was obtained by all participants  
13 aged over 16 years or by their parents or legal guardians if under 16 years old.  
14  
15

16  
17 **Availability of data and materials:** The datasets used and/or analyzed during the current study  
18 are available from the corresponding author on reasonable request.  
19  
20

21  
22 **Competing interests:** The authors declare that they have no competing interests.  
23  
24

25  
26 **Funding:** No funding was received for the present study.  
27  
28

29  
30 **Authors' contributions:**

31  
32 **JR** conceived and designed the study, collected, analyzed and interpreted the data and wrote  
33 the first draft of the manuscript.  
34  
35

36  
37 **CM** interpreted the data and critically reviewed the manuscript

38  
39 **SA** interpreted the data and critically reviewed the manuscript.  
40

41  
42 **RCO** prepared Figure 1 and analyzed and interpreted the data

43  
44 **RF** analyzed and interpreted the data and critically reviewed the manuscript.  
45

46  
47 **GO** critically reviewed the manuscript  
48

49  
50 **Acknowledgements:** Not applicable  
51  
52  
53  
54  
55  
56  
57  
58  
59  
60

1  
2  
3 What is already known on this topic:  
4

- 5 • There is increasing evidence of intestinal inflammation in cystic fibrosis (CF)
- 6
- 7 • Elevated fecal calprotectin has been found in CF patients
- 8
- 9

10  
11  
12  
13 What this study adds:  
14

- 15 • Focal inflammation in rectal biopsies was found in CF patients and it is associated to
- 16 elevated fecal calprotectin
- 17
- 18 • Fecal calprotectin may be a good indicator of intestinal inflammation in CF
- 19
- 20
- 21
- 22
- 23
- 24
- 25
- 26
- 27
- 28
- 29
- 30
- 31
- 32
- 33
- 34
- 35
- 36
- 37
- 38
- 39
- 40
- 41
- 42
- 43
- 44
- 45
- 46
- 47
- 48
- 49
- 50
- 51
- 52
- 53
- 54
- 55
- 56
- 57
- 58
- 59
- 60

**REFERENCES**

1. Elborn JS. Cystic fibrosis. *The Lancet*. 2016.
2. Marcão A, Barreto C, Pereira L, Vaz LG, Cavaco J, Casimiro A, et al. Cystic fibrosis newborn screening in Portugal: PAP value in populations with stringent rules for genetic studies. *Int J Neonatal Screen*. 2018.
3. Farrell PM. The prevalence of cystic fibrosis in the European Union. *J Cyst Fibros*. 2008.
4. Werlin SL, Benuri-Silbiger I, Kerem E, Adler SN, Goldin E, Zimmerman J, et al. Evidence of intestinal inflammation in patients with cystic fibrosis. *J Pediatr Gastroenterol Nutr*. 2010.
5. Dhaliwal J, Leach S, Katz T, Nahidi L, Pang T, Lee JM, et al. Intestinal inflammation and impact on growth in children with cystic fibrosis. *J Pediatr Gastroenterol Nutr*. 2015.
6. Norkina O, Kaur S, Ziemer D, De Lisle RC. Inflammation of the cystic fibrosis mouse small intestine. *Am J Physiol - Gastrointest Liver Physiol*. 2004.
7. De Lisle RC. Altered transit and bacterial overgrowth in the cystic fibrosis mouse small intestine. *Am J Physiol - Gastrointest Liver Physiol*. 2007.
8. Bruzzese E, Callegari ML, Raia V, Viscovo S, Scotto R, Ferrari S, et al. Disrupted intestinal microbiota and intestinal inflammation in children with cystic fibrosis and its restoration with lactobacillus gg: A randomised clinical trial. *PLoS One*. 2014.
9. Summerton CB, Longlands MG, Wiener K, Shreeve DR. Faecal calprotectin: A marker of inflammation throughout the intestinal tract. *Eur J Gastroenterol Hepatol*. 2002.
10. Montalto M, Santoro L, Curigliano V, D'Onofrio F, Cammarota G, Panunzi S, et al. Faecal calprotectin concentrations in untreated coeliac patients. *Scand J Gastroenterol*. 2007.
11. García-Sánchez V, Iglesias-Flores E, González R, Gisbert JP, Gallardo-Valverde JM, González-Galilea Á, et al. Does fecal calprotectin predict relapse in patients with Crohn's disease and ulcerative colitis? *J Crohn's Colitis*. 2010.
12. Schnapp Z, Hartman C, Livnat G, Shteinberg M, Elenberg Y. Decreased Fecal Calprotectin Levels in Cystic Fibrosis Patients after Antibiotic Treatment for Respiratory Exacerbation. *J*

1  
2  
3 Pediatr Gastroenterol Nutr. 2019;68:282–4.  
4

5 13. Stallings VA, Sainath N, Oberle M, Bertolaso C, Schall JI. Energy Balance and Mechanisms of  
6 Weight Gain with Ivacaftor Treatment of Cystic Fibrosis Gating Mutations. J Pediatr.  
7

8 2018;201:229-237.e4. doi:10.1016/J.JPEDS.2018.05.018.  
9

10 14. Farrell PM, White TB, Howenstine MS, Munck A, Parad RB, Rosenfeld M, et al. Diagnosis of  
11 Cystic Fibrosis in Screened Populations. J Pediatr. 2017.  
12

13 15. Sands BE. Biomarkers of Inflammation in Inflammatory Bowel Disease. Gastroenterology.  
14 2015.  
15

16 16. Rumman N, Sultan M, El-Chammas K, Goh V, Salzman N, Quintero D, et al. Calprotectin in  
17 Cystic Fibrosis. BMC Pediatr. 2014.  
18

19 17. De Lisle RC, Borowitz D. The cystic fibrosis intestine. Cold Spring Harb Perspect Med. 2013.  
20

21 18. Brennan GT, Saif MW. Pancreatic Enzyme Replacement Therapy: A Concise Review.  
22

23 19. Bruzzese E, Raia V, Gaudiello G, Polito G, Buccigrossi V, Formicola V, et al. Intestinal  
24 inflammation is a frequent feature of cystic fibrosis and is reduced by probiotic administration.  
25 Aliment Pharmacol Ther. 2004.  
26

27 20. Rumman N, El-Chammas K, Goh V, Salzman N, Quintero D, Werlin S. Calprotectin in Cystic  
28 Fibrosis. 2014. doi:10.1186/1471-2431-14-133.  
29

30 21. Dumoulin EN, Van Biervliet S, Delanghe JR. Trypsin is a Potential Confounder in  
31 Calprotectin Results. J Pediatr Gastroenterol Nutr. 2015;61:e19.  
32

33 doi:10.1097/MPG.0000000000000906.  
34

35 22. Neutra MR, Trier JS. Rectal Mucosa in Cystic Fibrosis: Morphological features before and  
36 after short term organ culture. Gastroenterology. 1978.  
37  
38  
39  
40  
41  
42  
43  
44  
45  
46  
47  
48  
49  
50  
51  
52  
53  
54  
55  
56  
57  
58  
59  
60

**Table 1. Genotype, body mass index, gastrointestinal symptoms, fecal calprotectin and rectal histology of patients with cystic fibrosis.**

| no. | Genotype          | BMI z-score<br>kg/m <sup>2</sup> | Pancreatic<br>function | Abdominal<br>pain | Diarrhea | Constipation | Calprotectin<br>(µg/g) | Histology    |
|-----|-------------------|----------------------------------|------------------------|-------------------|----------|--------------|------------------------|--------------|
| 1   | F508del/R334W     | -0,42                            | PS                     | yes               | no       | no           | 19                     | normal       |
| 2   | F508del/R334W     | 1,18                             | PS                     | no                | no       | no           | 15                     | normal       |
| 3   | F508del/R334W     | 0,94                             | PS                     | yes               | no       | yes          | 79                     | normal       |
| 4   | F508del/711+1G-T  | -0,74                            | PI                     | no                | no       | yes          | 9                      | normal       |
| 5   | F508del/711+1G-T  | -1,99                            | PI                     | no                | no       | no           | 19                     | normal       |
| 6   | F508del/2184insA  | -4,95                            | PI                     | yes               | yes      | no           | 45                     | normal       |
| 7   | F508del/c.3321dup | -0,22                            | PI                     | no                | no       | no           | 341                    | inflammation |
| 8   | F508del/P5L       | -0,3                             | PS                     | no                | no       | no           | 40                     | normal       |
| 9   | F508del/F508del   | -2,37                            | PI                     | no                | no       | no           | 223                    | inflammation |
| 10  | F508del/F508del   | -2,6                             | PI                     | no                | no       | no           | 62                     | inflammation |
| 11  | F508del/F508del   | -0,3                             | PI                     | yes               | no       | yes          | 63                     | inflammation |
| 12  | F508del/F508del   | -0,64                            | PI                     | no                | no       | no           | 55                     | -            |
| 13  | F508del/F508del   | 0,3                              | PI                     | no                | no       | no           | 90                     | -            |
| 14  | F508del/F508del   | 0,1                              | PI                     | no                | no       | no           | 352                    | -            |
| 15  | F508del/F508del   | -0,27                            | PI                     | no                | yes      | no           | 347                    | -            |
| 16  | F508del/F508del   | -0,13                            | PI                     | no                | no       | no           | 116                    | -            |
| 17  | F508del/F508del   | 0,1                              | PI                     | no                | no       | no           | 101                    | -            |
| 18  | F508del/F508del   | 0,55                             | PI                     | yes               | yes      | no           | 104                    | -            |
| 19  | F508del/F508del   | 1,42                             | PI                     | no                | no       | no           | 88                     | -            |
| 20  | F508del/F508del   | -1,16                            | PI                     | no                | no       | no           | 142                    | -            |
| 21  | F508del/F508del   | 0,03                             | PI                     | no                | no       | no           | 55                     | -            |
| 22  | F508del/F508del   | 1,1                              | PI                     | no                | no       | no           | 330                    | -            |
| 23  | F508del/F508del   | 1,2                              | PI                     | no                | no       | no           | 289                    | -            |

BMI – Body mass index; m- months; PI – pancreatic insufficiency; PS-pancreatic sufficiency

**Table 2. Association between gastrointestinal symptoms and meconium ileus past history and normal or elevated fecal calprotectin.**

| n=23           | Normal calprotectin<br>(n=6) |    | Elevated calprotectin<br>(n=17) |    | p#   |
|----------------|------------------------------|----|---------------------------------|----|------|
|                | yes                          | no | yes                             | no |      |
| Abdominal pain | 2                            | 4  | 3                               | 14 | 0.58 |
| Diarrhea       | 0                            | 6  | 3                               | 14 | 1    |
| Constipation   | 2                            | 4  | 1                               | 16 | 1    |
| Meconium ileus | 1                            | 5  | 4                               | 13 | 1    |

#Fisher exact test

**Table 3. Comparison of histologic rectal inflammation presence between patients with normal or elevated fecal calprotectin.**

| (n=11)               | Normal calprotectin<br>n=6 |    | Elevated calprotectin<br>n=5 |    | p#    |
|----------------------|----------------------------|----|------------------------------|----|-------|
|                      | yes                        | no | yes                          | no |       |
| Mucosal inflammation | 0                          | 6  | 4                            | 1  | 0.015 |

#Fisher exact test

**Figure 1 – A** - Histologic features of patient 8 (F508del/c.3321dup) showing mild to moderate focal inflammation, composed of plasma cells and small lymphocytes, in the mucosa, H&E 200x. **B** - Histologic features of patient 9 (F508del/F508del) showing mild focal inflammation of mononucleated cells of the mucosa in a vaguely nodular pattern (blue arrow), H&E 40x; **C** - Histologic features of patient 10 (F508del/F508del) showing mild focal inflammation of the mucosa, with small lymphocytes and plasma cells, between colonic crypts (blue arrow), H&E 40x, highlighted in higher magnification **D**, H&E 200x.

1  
2  
3  
4  
5  
6  
7  
8  
9  
10  
11  
12  
13  
14  
15  
16  
17  
18  
19  
20  
21  
22  
23  
24  
25  
26  
27  
28  
29  
30  
31  
32  
33  
34  
35  
36  
37  
38  
39  
40  
41

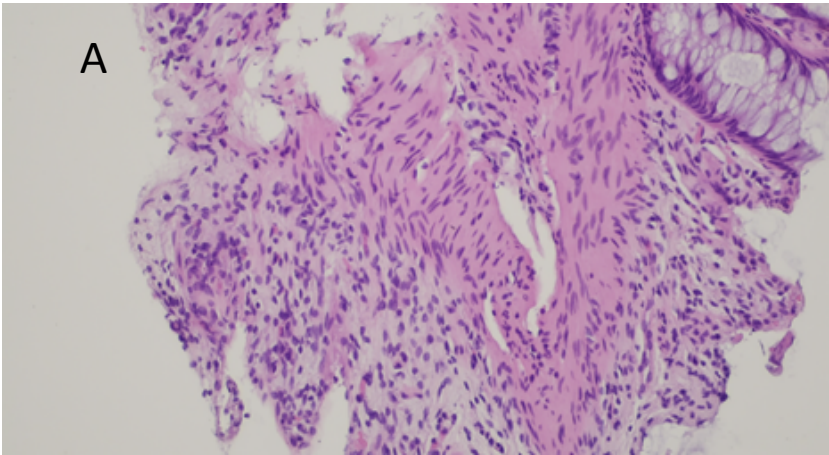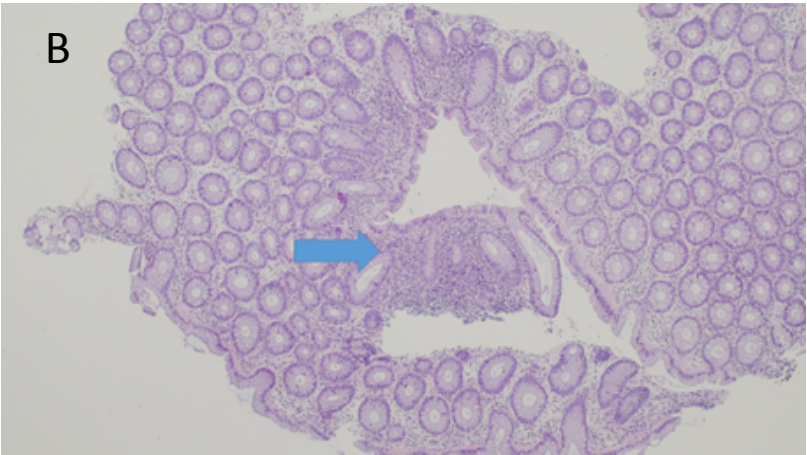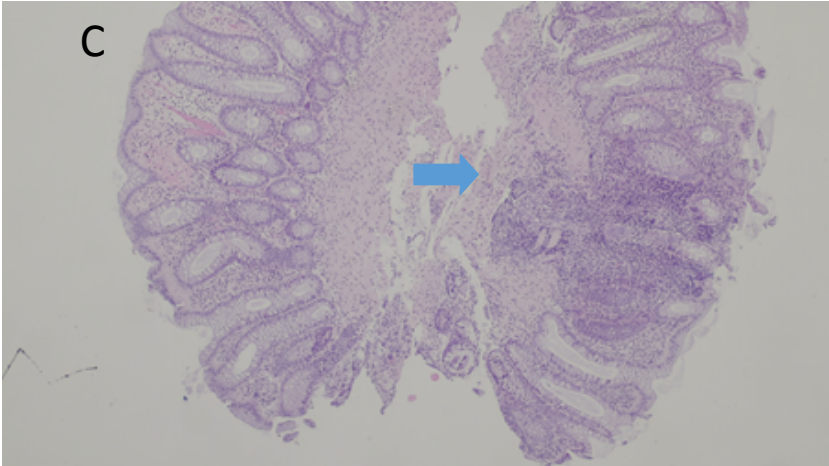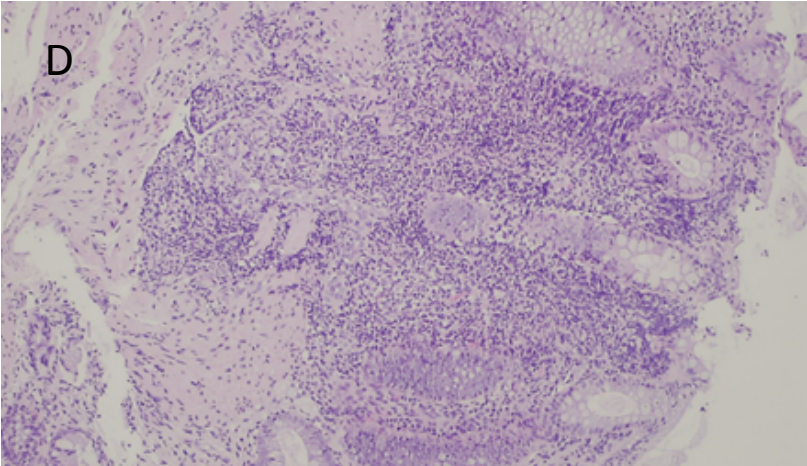



# BMJ Paediatrics Open

## Fecal calprotectin and rectal histologic inflammatory markers in cystic fibrosis - single centre study

|                               |                                                                                                                                                                                                                                                                                                                                                                                                                                                                                                                                                                                                                                                                                                                                                                                                                                                                                                                                                                                                                                                                                                                                                                                                                                                             |
|-------------------------------|-------------------------------------------------------------------------------------------------------------------------------------------------------------------------------------------------------------------------------------------------------------------------------------------------------------------------------------------------------------------------------------------------------------------------------------------------------------------------------------------------------------------------------------------------------------------------------------------------------------------------------------------------------------------------------------------------------------------------------------------------------------------------------------------------------------------------------------------------------------------------------------------------------------------------------------------------------------------------------------------------------------------------------------------------------------------------------------------------------------------------------------------------------------------------------------------------------------------------------------------------------------|
| Journal:                      | <i>BMJ Paediatrics Open</i>                                                                                                                                                                                                                                                                                                                                                                                                                                                                                                                                                                                                                                                                                                                                                                                                                                                                                                                                                                                                                                                                                                                                                                                                                                 |
| Manuscript ID                 | bmjpo-2022-001422.R1                                                                                                                                                                                                                                                                                                                                                                                                                                                                                                                                                                                                                                                                                                                                                                                                                                                                                                                                                                                                                                                                                                                                                                                                                                        |
| Article Type:                 | Original research                                                                                                                                                                                                                                                                                                                                                                                                                                                                                                                                                                                                                                                                                                                                                                                                                                                                                                                                                                                                                                                                                                                                                                                                                                           |
| Date Submitted by the Author: | 15-Mar-2022                                                                                                                                                                                                                                                                                                                                                                                                                                                                                                                                                                                                                                                                                                                                                                                                                                                                                                                                                                                                                                                                                                                                                                                                                                                 |
| Complete List of Authors:     | <p>Roda, Juliana; Centro Hospitalar e Universitario de Coimbra EPE Hospital Pediátrico de Coimbra, Pediatric Gastroenterology and Nutrition Unit; Universidade de Coimbra Faculdade de Medicina, Clínica Universitária de Pediatria</p> <p>Maia, Carla; Centro Hospitalar e Universitario de Coimbra EPE Hospital Pediátrico de Coimbra, Pediatric Gastroenterology and Nutrition Unit</p> <p>Almeida, Susana; Centro Hospitalar e Universitario de Coimbra EPE Hospital Pediátrico de Coimbra, Pediatric Gastroenterology and Nutrition Unit</p> <p>Oliveira, Rui ; Centro Hospitalar e Universitario de Coimbra EPE, Pathology Department; Universidade de Coimbra Faculdade de Medicina, Coimbra Institute for Clinical and Biomedical Research (iCBR) Area of Environment Genetics and Oncobiology (CIMAGO)</p> <p>Ferreira, Ricardo; Centro Hospitalar e Universitario de Coimbra EPE Hospital Pediátrico de Coimbra, Pediatric Gastroenterology and Nutrition Unit</p> <p>Oliveira, Guiomar; Centro Hospitalar e Universitario de Coimbra EPE Hospital Pediátrico de Coimbra, Centro de Desenvolvimento da Criança e Centro de Investigação e Formação Clínica; Universidade de Coimbra Faculdade de Medicina, Clínica Universitária de Pediatria</p> |
| Keywords:                     | Cystic Fibrosis, Gastroenterology                                                                                                                                                                                                                                                                                                                                                                                                                                                                                                                                                                                                                                                                                                                                                                                                                                                                                                                                                                                                                                                                                                                                                                                                                           |
|                               |                                                                                                                                                                                                                                                                                                                                                                                                                                                                                                                                                                                                                                                                                                                                                                                                                                                                                                                                                                                                                                                                                                                                                                                                                                                             |

SCHOLARONE™  
Manuscripts



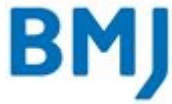

I, the Submitting Author has the right to grant and does grant on behalf of all authors of the Work (as defined in the below author licence), an exclusive licence and/or a non-exclusive licence for contributions from authors who are: i) UK Crown employees; ii) where BMJ has agreed a CC-BY licence shall apply, and/or iii) in accordance with the terms applicable for US Federal Government officers or employees acting as part of their official duties; on a worldwide, perpetual, irrevocable, royalty-free basis to BMJ Publishing Group Ltd ("BMJ") its licensees and where the relevant Journal is co-owned by BMJ to the co-owners of the Journal, to publish the Work in this journal and any other BMJ products and to exploit all rights, as set out in our [licence](#).

The Submitting Author accepts and understands that any supply made under these terms is made by BMJ to the Submitting Author unless you are acting as an employee on behalf of your employer or a postgraduate student of an affiliated institution which is paying any applicable article publishing charge ("APC") for Open Access articles. Where the Submitting Author wishes to make the Work available on an Open Access basis (and intends to pay the relevant APC), the terms of reuse of such Open Access shall be governed by a Creative Commons licence – details of these licences and which [Creative Commons](#) licence will apply to this Work are set out in our licence referred to above.

Other than as permitted in any relevant BMJ Author's Self Archiving Policies, I confirm this Work has not been accepted for publication elsewhere, is not being considered for publication elsewhere and does not duplicate material already published. I confirm all authors consent to publication of this Work and authorise the granting of this licence.

1  
2  
3 1 **Title: Fecal calprotectin and rectal histologic inflammatory markers in cystic fibrosis – a**  
4  
5 2 **single centre study**  
6  
7

8 3 **Authors:**  
9

10 4 **Corresponding author:**  
11

12  
13 5 **Juliana Roda**  
14

15 6 **MD**  
16

17 7 Pediatric Gastroenterology and Nutrition Unit, Hospital Pediátrico - Centro Hospitalar e  
18

19 8 Universitário de Coimbra, Coimbra, Portugal  
20

21 9 Avenida Afonso Romão, 3000-602 Coimbra, Portugal  
22

23 10 Telephone: +351 962748392  
24

25 11 Email: [juroda@hotmail.com](mailto:juroda@hotmail.com)  
26

27 12 <https://orcid.org/0000-0001-8990-779X>  
28  
29  
30  
31  
32

33 14 **Carla Maia**  
34

35 15 **MD**  
36

37 16 Pediatric Gastroenterology and Nutrition Unit, Hospital Pediátrico - Centro Hospitalar e  
38

39 17 Universitário de Coimbra, Coimbra, Portugal  
40

41 18 Email: [carla.maia@chuc.min-saude.pt](mailto:carla.maia@chuc.min-saude.pt)  
42  
43  
44  
45  
46

47 20 **Susana Almeida**  
48

49 21 **MD**  
50

51 22 Pediatric Gastroenterology and Nutrition Unit, Hospital Pediátrico - Centro Hospitalar e  
52

53 23 Universitário de Coimbra, Coimbra, Portugal  
54

55 24 Email: [susana.almeida.coimbra@gmail.com](mailto:susana.almeida.coimbra@gmail.com)  
56  
57  
58  
59  
60

1  
2  
3  
4  
5  
6  
7  
8  
9  
10  
11  
12  
13  
14  
15  
16  
17  
18  
19  
20  
21  
22  
23  
24  
25  
26  
27  
28  
29  
30  
31  
32  
33  
34  
35  
36  
37  
38  
39  
40  
41  
42  
43  
44  
45  
46  
47  
48  
49  
50  
51  
52  
53  
54  
55  
56  
57  
58  
59  
60

1  
2  
3  
4  
5  
6  
7  
8  
9  
10  
11  
12  
13  
14  
15  
16  
17  
18  
19  
20  
21  
22  
23  
24  
25  
26  
27  
28  
29  
30  
31  
32  
33  
34  
35  
36  
37  
38  
39  
40  
41  
42  
43  
44  
45  
46  
47  
48  
49  
50  
51  
52  
53  
54  
55  
56  
57  
58  
59  
60

**Rui Caetano Oliveira**

**MD, PhD**

Pathology Department, Centro Hospitalar e Universitário de Coimbra, Portugal; Biophysics Institute, Faculty of Medicine, University of Coimbra, 3000-548, Portugal  
Coimbra Institute for Clinical and Biomedical Research (iCBR) Area of Environment Genetics and Oncobiology (CIMAGO), Faculty of Medicine, University of Coimbra, 3000-548, Coimbra, Portugal  
Email: ruipedrocoliveira@hotmail.com

**Ricardo Ferreira**

**MD**

Pediatric Gastroenterology and Nutrition Unit, Hospital Pediátrico - Centro Hospitalar e Universitário de Coimbra, Coimbra, Portugal  
Email: ricardo.ferreira@chuc.min-saude.pt

**Guiomar Oliveira**

**MD, PhD**

Centro de Desenvolvimento da Criança e Centro de Investigação e Formação Clínica, Hospital Pediátrico – Centro Hospitalar e Universitário de Coimbra, Coimbra, Portugal  
Clínica Universitária de Pediatria, Faculdade de Medicina da Universidade de Coimbra, Coimbra, Portugal  
Email: guiomar@chuc.min-saude.pt  
<https://orcid.org/0000-0002-7049-1277>

**Word count:** 2661 words

**1 ABSTRACT**

2 Objective: To analyze the association of fecal calprotectin with the genetic and clinical  
3 characteristics of pediatric patients with cystic fibrosis (PwCF). In a subset of these patients, we  
4 aimed to associate histologic inflammatory features of rectal mucosa to fecal calprotectin  
5 levels.

6 Methods: In a prospective study, fecal calprotectin levels were collected in all 23 PwCF  
7 attending our pediatric center, together with demographic and clinical data. Associations  
8 between fecal calprotectin and clinical features were determined. In 11 of these patients,  
9 endoscopic rectal biopsies were obtained and the association between fecal calprotectin and  
10 histologic inflammatory markers was analyzed. Statistical analyses included Spearman's  
11 correlation coefficient, Mann-Whitney and Exact Fisher tests. Sensitivity and specificity was  
12 calculated.

13 Results: Median age of PwCF was 12 years, 19 had pancreatic insufficiency (PI) (19/23).  
14 Seventeen (17/23) had elevated fecal calprotectin, and the median value was 88 µg/g  
15 (IQR=178 µg/g). Higher fecal calprotectin levels were observed in the PI group (101 vs 30 µg/g,  
16 P=0.027). No significant correlation between elevated fecal calprotectin level and BMI z-score  
17 was found. Five patients (22%) reported abdominal pain, three (13%) complained of diarrhea  
18 and three (13%) had constipation, but these symptoms were not associated with elevated  
19 fecal calprotectin.

20 Unspecific focal rectal inflammation was found in four patients (4/11). An association between  
21 rectal mucosa inflammation and elevated fecal calprotectin was found (p=0.015). Sensitivity  
22 was 100% and specificity was 86%.

23 Conclusions: In our PwCF, elevated fecal calprotectin was frequent, particularly if PI, and it was  
24 not related to gastrointestinal symptoms or malnutrition. Elevated fecal calprotectin was

1  
2  
3  
4  
5  
6  
7  
8  
9  
10  
11  
12  
13  
14  
15  
16  
17  
18  
19  
20  
21  
22  
23  
24  
25  
26  
27  
28  
29  
30  
31  
32  
33  
34  
35  
36  
37  
38  
39  
40  
41  
42  
43  
44  
45  
46  
47  
48  
49  
50  
51  
52  
53  
54  
55  
56  
57  
58  
59  
60

1 present in patients with histologic evidence of rectal inflammation. Fecal calprotectin may be  
2 an indicator of asymptomatic rectal inflammation in PwCF.

3

4 **Keywords:** cystic fibrosis, gastroenterology

5 **List of abbreviations:**

6 BMI - Body mass index

7 CF - Cystic fibrosis

8 CFTR - Cystic Fibrosis Transmembrane conductance Regulator

9 IQR – Interquartile range

10 PERT - pancreatic enzyme replacement therapy

11 PI - Pancreatic insufficiency

12 PS - pancreatic sufficient

13

14

## 1 BACKGROUND

2 Cystic fibrosis (CF) is a severe autosomal recessive disease that results from mutations in a  
3 gene encoding the cystic fibrosis transmembrane conductance regulator (CFTR) protein, a  
4 chloride channel [1]. It is the most common life-limiting genetic disease among Caucasians,  
5 occurring in 1 of 2500 live births worldwide. In Portugal, a prevalence of 0.27 per 10,000  
6 inhabitants and an incidence of 1 per 7500 newborns have been estimated [2, 3].

7 CF is also the most common cause of pancreatic insufficiency (PI) in children [4]. Historically,  
8 CF children died in infancy from severe malnutrition and later from respiratory failure, but due  
9 to improved clinical care, including pancreatic enzyme replacement therapy (PERT), currently,  
10 a majority of them reach adulthood [5]. Approximately 85% of CF patients have impaired  
11 digestion due to PI and despite adequate PERT, several CF patients still have malabsorption,  
12 growth impairment and gastrointestinal problems, including abdominal pain, steatorrhea, and  
13 altered motility [4, 5]. It has been suggested that digestive symptoms are attributable not only  
14 to PI but also to intestinal inflammation. However, the pathogenesis and nutritional  
15 implications of this finding remains unclear [5].

16 Studies, in both animals and humans, have reported evidence of intestinal inflammation in CF.  
17 In the mouse model of CF, the most common manifestation is intestinal obstruction resulting  
18 from inflammatory enteropathy, leading to perforation [6]. Furthermore, abnormal mucus  
19 accumulation in the intestines of murine models predisposes them to gut dysmotility, creating  
20 a niche for bacterial overgrowth and dysbiosis [7].

21 In humans, the presence of inflammatory biomarkers, including fecal calprotectin, eosinophil  
22 cationic protein, interleukin-1B and interleukin-8, was reported, suggesting that intestinal  
23 inflammation is a feature of CF [5, 8]. Videocapsule endoscopic studies elicited mucosal  
24 ulceration, erythema and mucosal breaks in the small bowel of CF patients, particularly those  
25 with PI [4]. Calprotectin is a neutrophil secretory product, and elevated fecal levels are well  
26 correlated with colonic inflammation in inflammatory bowel disease [9–11]. Dysbiosis may be

1 associated with intestinal inflammation as reflected by increased levels of fecal calprotectin  
2  
3  
4  
5 2 that respond to antibiotic treatment [12]. CFTR modulators may potentially improve dysbiosis  
6  
7  
8 3 and inflammation, for example ivacaftor has been associated with a decrease in calprotectin  
9  
10 4 levels[13].

11  
12 5 However, to our knowledge, there are no studies characterizing intestinal histological  
13  
14 6 inflammatory findings in CF patients and, particularly, studies analysing the relationship  
15  
16 7 between elevated fecal calprotectin and these histologic inflammatory findings.

17  
18 8 The aim of the present study was to analyze, in a cohort of pediatric CF patients, the  
19  
20 9 association between fecal calprotectin levels and genetic and clinical characteristics, including  
21  
22 10 nutritional status and gastrointestinal symptoms. In a subset of this cohort, we also aimed to  
23  
24 11 characterize histological inflammatory features of rectal mucosa and relate it to fecal  
25  
26 12 calprotectin levels.

## 30 13 **METHODS**

31  
32  
33 14 This prospective study included children and adolescents aged 0 to 18 years followed in the  
34  
35 15 Pediatric Unit of the Cystic Fibrosis Reference Centre of the Centro Hospitalar e Universitário  
36  
37 16 de Coimbra, Portugal, in the year 2019. The criteria for the diagnosis of CF were: clinical  
38  
39 17 characteristics compatible with CF, a positive sweat test and a genetic study with the  
40  
41 18 identification of two disease-causing mutations, according to the latest consensus [14]. All  
42  
43 19 patients willing to participate were included. Exclusion criteria included recent respiratory  
44  
45 20 exacerbation/infection or ingestion of antibiotics, steroids or nonsteroidal anti-inflammatory  
46  
47 21 drugs, both in the previous 4 weeks.

48  
49  
50 22 In all participants, demographic data, genotype and clinical data, including nutritional status  
51  
52 23 and PERT medication, were collected at the time of the appointment where stool sample was  
53  
54 24 obtained. Nutritional status was assessed according to the z-score of weight, height, and body  
55  
56 25 mass index (BMI). Patients were asked whether they had experienced gastrointestinal  
57  
58  
59  
60

1 symptoms (abdominal pain, constipation or diarrhea) in the two weeks preceding the  
2 calprotectin measurement.

3 Exocrine pancreatic function was assessed using fecal elastase levels. PI was considered when  
4 the fecal elastase level was under 200 µg/g; above that, they were classified as pancreatic  
5 sufficient (PS).

### 6 7 **Fecal calprotectin measurement**

8 Stool samples were collected at home or at the CF Reference Centre. Calprotectin level in the  
9 fecal samples were measured using EliA Calprotectin® (reagents from Thermo Fisher  
10 Scientific®). Fecal calprotectin concentration was considered normal up to 50 µg/g stool, as  
11 was considered in previous studies with CF patients [4] and as it has been shown to be  
12 sensitive for detecting inflammation in children with inflammatory bowel disease [15].

### 13 14 **Rectal biopsies**

15 Rectal biopsies were obtained, from patients already enrolled in another study from our  
16 center, which aimed to test CFTR modulator responses in intestinal organoids from patients  
17 with rarer mutations (data not yet published; *UID/MULTI/04046/2019*). As a consequence,  
18 most of these patients had less common mutations. Time between fecal calprotectin  
19 measurement and rectal biopsies was a maximum of two days.

20 Rectal mucosa specimens (3-4 mm in diameter) were obtained from eleven patients, with or  
21 without sedation (depending on individuals will or collaboration) using a colonoscope and  
22 colon forceps (Endoflex®, diameter 2.8 mm). Samples were immediately stored in formalin.

23 One pathologist with experience in gastrointestinal pathology from the Pathology Department,  
24 Centro Hospitalar e Universitário de Coimbra, Portugal performed the histologic analysis.  
25 Samples were blinded to the clinical information and were analyzed under an optical



1  
2  
3 1 microscope (Nikon Eclipse 50i®). Pictures were taken with a Nikon-Digital Sight DS-Fi1® digital  
4  
5 2 camera.

6  
7 3 Since the diagnosis of CF is based mainly on bioelectrical/biochemical analyses, there is no  
8  
9 4 defined standard histological classification score. Therefore, the evaluation took into  
10  
11 5 consideration the density of mononucleated inflammatory population, on a semi quantitative  
12  
13 6 approach: none, mild, moderate and severe.  
14  
15

### 16 7 17 18 8 **Statistical Analysis**

19  
20 9 Statistical analyses were performed with SPSS software (v.19; SPSS Inc., Chicago, IL, USA), and  
21  
22 10 a p value < 0.05 was considered statistically significant. Descriptive statistics were presented  
23  
24 11 according to the normality of the data distribution using Shapiro-Wilk test. Spearman's  
25  
26 12 correlation coefficient, Mann-Whitney and Exact Fisher tests were used between patient  
27  
28 13 groups to evaluate correlation, differences and associations, respectively. Sensitivity and  
29  
30 14 specificity of calprotectin as a marker of rectal inflammation was calculated.  
31  
32  
33  
34  
35

### 36 16 **Ethics Approval**

37  
38 17 The present study was performed in accordance with the Declaration of Helsinki and approved  
39  
40 18 by the board of the Centro Hospitalar e Universitário de Coimbra (Portugal) after a favorable  
41  
42 19 report by the Health Ethics Committee (Ref. CHUC-080-16). Informed consent was obtained by  
43  
44 20 all participants aged over 16 years or by their parents or legal guardians if under 16 years old.  
45  
46  
47  
48  
49

### 50 22 **Patient involvement**

51  
52 23 Patients were not directly involved in setting the research question, the design or in the  
53  
54 24 implementation of the project.  
55  
56  
57  
58  
59  
60

1

2 **RESULTS**

3 Fecal calprotectin was measured in all 23 PwCF followed in our center during one year. The  
4 median age was 12 years, aged from 2 months to 17 years old. Twelve were male. All patients  
5 with PI (19/23, 83%) were taking PERT. The F508del mutation was present in all patients in at  
6 least one allele. Fifteen (65%) patients were F508del homozygous, and the others carried one  
7 of the following mutations: R334W (n=3), 711+ 1G->T (n=2), and 2184insA (n=1), P5L (n=1) and  
8 a novel mutation, c.3321dup (n=1) (Table 1). Only two patients were taking CFTR modulator  
9 lumacaftor/ivacaftor (patient 15 and patient 20, presenting fecal calprotectin level of 347 and  
10 142 µg/g, respectively). Sweat test of these patients did not improve with modulator drug.  
11 Seventeen of the 23 patients (74%) had an elevated fecal calprotectin measurement, and the  
12 median value was 88 µg/g (IQR=178 µg/g). Most patients (16/19) with PI had elevated fecal  
13 calprotectin (84%). The PI group had higher fecal calprotectin levels than in the PS group (101  
14 µg/g; IQR=234 vs 30 µg/g; IQR=53; p=0.0027).

15 A moderate positive correlation was found between fecal calprotectin and sweat test values  
16 (from the time of diagnosis) (r=0.46; p=0.029). A weak negative correlation was found  
17 between age and fecal calprotectin (r=-0.3; p=0.14). Also meconium ileus past history was not  
18 associated with elevated calprotectin (Table 2).

19 Comparing the median BMI z-score in patients with normal and elevated fecal calprotectin, no  
20 significant difference was found (-0.58 kg/m<sup>2</sup>; IQR= 2.8 vs 0.1 kg/m<sup>2</sup>; IQR=1.08; p=0.09). No  
21 significant correlation between fecal calprotectin level and BMI z-score was found (r=0.19;  
22 p=0.36).

23 All 15 patients homozygous for the F508del mutation had elevated fecal calprotectin. These  
24 PwCF have a statistically significant higher fecal calprotectin than F508del heterozygous  
25 patients (110 µg/g; IQR=217 vs 40 µg/g; IQR=54, p=0.003).

1  
2  
3 1 Some CF patients reported digestive symptoms: five patients (22%) reported abdominal pain,  
4  
5 2 three (13%) complained of diarrhea, and three (13%) had constipation (Table 1).  
6  
7 3 Gastrointestinal symptoms were not associated with elevated fecal calprotectin (Table 2).  
8  
9  
10 4

## 11 5 **Histologic features**

12  
13  
14 6 Rectal biopsies were obtained from 11 of the 23 PwCF. Eight patients had the rarer mutations  
15  
16 7 R334W (n=3), 711+1G-T (n=2), P5L (n=1), c.3321dup (n=1) and 2184insA (n=1), and three  
17  
18 8 patients were homozygous for the F508del mutation.

19  
20  
21 9 Unspecific mild focal inflammation was found in the three F508del homozygous patients, all of  
22  
23 10 which had elevated fecal calprotectin (Table 1). Inflammatory features were characterized as  
24  
25 11 small lymphocyte and plasma cell infiltrates distributed in a vaguely nodular pattern between  
26  
27 12 colonic crypts (Figure 1 – B, C and D).

28  
29  
30 13 Mild to moderate focal inflammation composed of plasma cells and small lymphocytes in the  
31  
32 14 mucosa was found in the patient carrying F508del in one allele and the new mutation  
33  
34 15 c.3321dup in the other allele (Figure 1 – A). This patient had significantly elevated fecal  
35  
36 16 calprotectin (341 µg/g) (patient 7; Table 1).

37  
38  
39 17 There was an association between elevated fecal calprotectin levels and the presence of  
40  
41 18 inflammation in rectal biopsies (Table 3). In our study, sensitivity of calprotectin levels was  
42  
43 19 100% and specificity was 86%.

44  
45 20 Median calprotectin was higher in PwCF with histological inflammatory alterations comparing  
46  
47 21 with PwCF with normal histology (143 µg/g; IQR=249 vs 19 µg/g; IQR=30; p=0.024). None of  
48  
49 22 the mucosal samples had architectural changes, which are a major sign of chronic  
50  
51 23 inflammation.

## 52 24 53 54 55 56 25 **DISCUSSION**

1  
2  
3 1 Most patients from this study (78%) had an elevated fecal calprotectin level, some reaching a  
4  
5 2 maximum level of more than 300 µg/g. This is consistent with previous studies and suggests  
6  
7 3 the presence of intestinal inflammation in PwCF [4, 5, 16]. The pathophysiology of intestinal  
8  
9 4 inflammation may be explained by the same triad of obstruction by mucus accumulation,  
10  
11 5 inflammation and infection that causes disease in the airways of PwCF [17]. The *CFTR* gene is  
12  
13 6 strongly expressed all along the intestinal tract in a cephalad-caudal gradient, *CFTR* messenger  
14  
15 7 RNA levels are highest in the duodenum and levels decrease distally along the small intestine  
16  
17 8 to the large intestine [17]. This “CF enteropathy” may be an independent entity in the disease  
18  
19 9 process or may be due to other factors. High doses of PERT can cause inflammation and  
20  
21 10 fibrosing colonopathy[18]. Inspissated intestinal secretions, mucus accumulation, constipation,  
22  
23 11 slow intestinal motility, the use of proton pump inhibitors and frequent courses of antibiotics  
24  
25 12 are multiple risk factors for small bowel bacterial overgrowth in CF patients, which can cause  
26  
27 13 inflammation, mucosal damage and aggravate maldigestion [16]. An unfavorable intestinal  
28  
29 14 microbiome may also be a stimulus for inflammation [19, 20]. One trial with probiotics  
30  
31 15 supported this hypothesis, as the use of *Lactobacillus rhamnosus GG* reduced calprotectin  
32  
33 16 concentrations in CF children [19]. Another study, found increased abundances of  
34  
35 17 *Staphylococcus*, *Streptococcus*, and *Veillonella dispar*, along with decreased abundances of  
36  
37 18 *Bacteroides*, *Bifidobacterium adolescentis*, and *Faecalibacterium prausnitzii* to be associated  
38  
39 19 to intestinal inflammation in PwCF in similarity to changes found in patients with Crohn’s  
40  
41 20 disease [20].  
42  
43  
44  
45  
46  
47  
48 21 In our study, lower fecal calprotectin levels were found in PS patients. Elevated fecal  
49  
50 22 calprotectin only in PI patients has also been reported by Dhaliwal *et al* [5]. On the other hand,  
51  
52 23 sixteen of nineteen patients with PI had elevated fecal calprotectin, and the difference in fecal  
53  
54 24 calprotectin levels between the PI and PS groups was impressive (101 vs 30 µg/g). This means  
55  
56 25 that either PI by itself or PERT may be responsible for intestinal inflammation in these  
57  
58 26 patients[21]. However, there has been reported a lack of correlation between PERT and fecal  
59  
60

1 calprotectin[22]. As reported by Dumoulin *et al.*, calprotectin is subject to proteolysis by tripsin  
2 activity, which is virtually absent in PI PwCF. As a result, calprotectin proteolysis is also  
3 reduced. Therefore, calprotectin levels detected in stools of PI patients may be higher, and this  
4 may not be exclusively attributed to intestinal inflammation[23]. Perhaps, in PI PwCF, the  
5 upper limit of the considered "normal" fecal calprotectin should be higher than the value  
6 considered for inflammatory bowel disease, as no association was found with digestive  
7 symptoms [23, 24]. Some recent studies suggest an upper limit of >50 µg/g or 250 µg/g and it  
8 remains unclear whether reference ranges that are useful in IBD are equally applicable in  
9 CF[20, 24]. Also, the pancreatic status is related to CFTR function and genotype and intestinal  
10 inflammation may be another manifestation of the multisystemic involvement of the disease  
11 and not only influenced by pancreatic function [25].

12 Another interesting finding was that PwCF F508del homozygous have significantly higher  
13 calprotectin levels in comparison to heterozygotes. This genotype may be associated with an  
14 increased risk of more significant intestinal inflammation.

15 Overall, only a small number of patients complained of gastrointestinal symptoms, and no  
16 association between elevated calprotectin and digestive symptoms could be found. The same  
17 conclusion has been reported even in studies where digestive symptoms were much more  
18 frequent[22].

19 In contrast to previous studies [5], no relationship could be found between fecal calprotectin  
20 and nutritional status or growth parameters. However, interestingly, a positive correlation was  
21 found between fecal calprotectin and sweat test values, which may be indicative of the  
22 presence of significant intestinal inflammation in patients with a more severe phenotype. The  
23 negative correlation found between fecal calprotectin and age is in line with the reported  
24 tendency towards lower values with increasing age reported in the literature, even though  
25 there are no well-established cut off levels for specific age ranges[26].

1  
2  
3 1 Historically, distinct histological changes, which have been interpreted as signs of mucus  
4  
5 2 hypersecretion, have been reported in light microscopic studies of large intestinal mucosa  
6  
7 3 from CF patients. "Hypertrophic" or enlarged goblet cells and crypts distended by accumulated  
8  
9 4 mucus were described, and these changes were considered useful in the diagnosis of CF by  
10  
11 5 some authors [27]. In this study we were specifically looking for histologic evidence of  
12  
13 6 inflammation in CF patients and try to associate it to fecal calprotectin.

14  
15  
16 7 Four out of the eleven patients to whom rectal biopsies were performed had histologic  
17  
18 8 inflammatory alterations. Interestingly, all the three patients homozygous for F508del  
19  
20 9 mutation had histological signs of inflammation and this may be related to the severe  
21  
22 10 phenotype associated to this common mutation.

23  
24  
25 11 Elevated calprotectin level was associated with histologic inflammation in the rectal mucosa  
26  
27 12 (Table 3) and PwCF with rectal inflammation had a significantly higher calprotectin level. High  
28  
29 13 sensitivity and specificity, allows us to conclude that fecal calprotectin may be a good indicator  
30  
31 14 of rectal inflammation in PwCF. However, the clinical meaning of this finding remains to be  
32  
33 15 explained, as this did not translate into more frequent gastrointestinal symptoms or influenced  
34  
35 16 nutritional status. However, as the life expectancy of PwCF is increasing there has been  
36  
37 17 reported an increased risk of gastrointestinal malignancies. Chronic intestinal inflammation is a  
38  
39 18 risk factor for cancer development and this should probably be addressed early in life[24].

40  
41  
42  
43 19 We are aware that our study had several limitations: it is a small and unicentric study, and  
44  
45 20 biopsies were performed on a subset of our patients and limited to the rectum. Larger  
46  
47 21 multicenter studies with the aim of determining serial and longitudinal studies of calprotectin  
48  
49 22 levels and biopsies of the upper and lower gastrointestinal tract may help to determine clinical  
50  
51 23 relevance.

52  
53  
54 24 However, the finding of abnormal calprotectin levels and inflammatory alterations in the  
55  
56 25 intestinal mucosa in the pediatric population raises questions about the early detection of CF  
57  
58 26 enteropathy.

1  
2  
3 1 In conclusion, there is increasing evidence that intestinal inflammation is part of CF and is  
4  
5 2 present early in life, particularly in childhood and adolescence. The additional contribution of  
6  
7 3 low trypsin activity, chronic enzyme dosage, dysmotility, bacterial overgrowth, dysbiosis and  
8  
9 4 other unidentified factors may play a role in its multifactorial cause. Fecal calprotectin may be  
10  
11 5 considered a noninvasive biomarker of intestinal inflammation in CF patients since a  
12  
13 6 relationship with histologic evidence of rectal mucosa inflammation was found. Further and  
14  
15 7 larger studies need to be performed to confirm and explain the mechanisms and clinical  
16  
17 8 relevance of these findings.  
18  
19  
20  
21 9  
22  
23  
24  
25  
26  
27  
28  
29  
30  
31  
32  
33  
34  
35  
36  
37  
38  
39  
40  
41  
42  
43  
44  
45  
46  
47  
48  
49  
50  
51  
52  
53  
54  
55  
56  
57  
58  
59  
60

1  
2  
3 1 **Ethics approval and consent to participate:** The present study was performed in accordance  
4  
5 2 with the Declaration of Helsinki and approved by the board of the Centro Hospitalar e  
6  
7 3 Universitário de Coimbra (Portugal) after a favorable report by the Health Ethics Committee  
8  
9 4 (Ref. CHUC-080-16). Informed consent was obtained by all participants aged over 16 years or  
10  
11 5 by their parents or legal guardians if under 16 years old.

12  
13  
14 6 **Consent for publication:** Informed consent for publication was obtained by all participants  
15  
16 7 aged over 16 years or by their parents or legal guardians if under 16 years old.

17  
18  
19 8 **Availability of data and materials:** The datasets used and/or analyzed during the current study  
20  
21 9 are available from the corresponding author on reasonable request.

22  
23 10 **Competing interests:** The authors declare that they have no competing interests.

24  
25 11 **Funding:** No funding was received for the present study.

26  
27  
28  
29  
30 12  
31 13 **Authors' contributions:**

32 14 **JR** conceived and designed the study, collected, analyzed and interpreted the data and wrote  
33  
34 15 the first draft of the manuscript.

35  
36 16 **CM** interpreted the data and critically reviewed the manuscript

37  
38 17 **SA** interpreted the data and critically reviewed the manuscript.

39  
40 18 **RCO** prepared Figure 1 and analyzed and interpreted the data

41  
42 19 **RF** analyzed and interpreted the data and critically reviewed the manuscript.

43  
44 20 **GO** critically reviewed the manuscript

45  
46 21 **Acknowledgements:** Not applicable

47  
48  
49  
50 22

51  
52  
53  
54  
55  
56  
57  
58  
59  
60 23



1  
2  
3  
4  
5  
6  
7  
8  
9  
10  
11  
12  
13  
14  
15  
16  
17  
18  
19  
20  
21  
22  
23  
24  
25  
26  
27  
28  
29  
30  
31  
32  
33  
34  
35  
36  
37  
38  
39  
40  
41  
42  
43  
44  
45  
46  
47  
48  
49  
50  
51  
52  
53  
54  
55  
56  
57  
58  
59  
60

1 What is already known on this topic:

- 2 • There is increasing evidence of intestinal inflammation in cystic fibrosis (CF)
- 3 • Elevated fecal calprotectin has been found in CF patients

4  
5 What this study adds:

- 6 • Focal inflammation in rectal biopsies was found in CF patients and it is associated to
- 7 elevated fecal calprotectin
- 8 • Fecal calprotectin may be an indicator of intestinal inflammation in CF

Confidential: For Review Only

**1 REFERENCES**

- 1 1. Elborn JS. Cystic fibrosis. *The Lancet*. 2016.
- 2 2. Marcão A, Barreto C, Pereira L, Vaz LG, Cavaco J, Casimiro A, et al. Cystic fibrosis newborn  
3 screening in Portugal: PAP value in populations with stringent rules for genetic studies. *Int J*  
4 *Neonatal Screen*. 2018.
- 5 3. Farrell PM. The prevalence of cystic fibrosis in the European Union. *J Cyst Fibros*. 2008.
- 6 4. Werlin SL, Benuri-Silbiger I, Kerem E, Adler SN, Goldin E, Zimmerman J, et al. Evidence of  
7 intestinal inflammation in patients with cystic fibrosis. *J Pediatr Gastroenterol Nutr*. 2010.
- 8 5. Dhaliwal J, Leach S, Katz T, Nahidi L, Pang T, Lee JM, et al. Intestinal inflammation and  
9 impact on growth in children with cystic fibrosis. *J Pediatr Gastroenterol Nutr*. 2015.
- 10 6. Norkina O, Kaur S, Ziemer D, De Lisle RC. Inflammation of the cystic fibrosis mouse small  
11 intestine. *Am J Physiol - Gastrointest Liver Physiol*. 2004.
- 12 7. De Lisle RC. Altered transit and bacterial overgrowth in the cystic fibrosis mouse small  
13 intestine. *Am J Physiol - Gastrointest Liver Physiol*. 2007.
- 14 8. Bruzzese E, Callegari ML, Raia V, Viscovo S, Scotto R, Ferrari S, et al. Disrupted intestinal  
15 microbiota and intestinal inflammation in children with cystic fibrosis and its restoration with  
16 *lactobacillus gg*: A randomised clinical trial. *PLoS One*. 2014.
- 17 9. Summerton CB, Longlands MG, Wiener K, Shreeve DR. Faecal calprotectin: A marker of  
18 inflammation throughout the intestinal tract. *Eur J Gastroenterol Hepatol*. 2002.
- 19 10. Montalto M, Santoro L, Curigliano V, D'Onofrio F, Cammarota G, Panunzi S, et al. Faecal  
20 calprotectin concentrations in untreated coeliac patients. *Scand J Gastroenterol*. 2007.
- 21 11. García-Sánchez V, Iglesias-Flores E, González R, Gisbert JP, Gallardo-Valverde JM, González-  
22 Galilea Á, et al. Does fecal calprotectin predict relapse in patients with Crohn's disease and  
23 ulcerative colitis? *J Crohn's Colitis*. 2010.
- 24 12. Schnapp Z, Hartman C, Livnat G, Shteinberg M, Elenberg Y. Decreased Fecal Calprotectin  
25 Levels in Cystic Fibrosis Patients after Antibiotic Treatment for Respiratory Exacerbation. *J*  
26

- 1  
2  
3 1 Pediatr Gastroenterol Nutr. 2019;68:282–4.  
4  
5 2 13. Stallings VA, Sainath N, Oberle M, Bertolaso C, Schall JI. Energy Balance and Mechanisms of  
6  
7 3 Weight Gain with Ivacaftor Treatment of Cystic Fibrosis Gating Mutations. J Pediatr.  
8  
9 4 2018;201:229-237.e4. doi:10.1016/J.JPEDS.2018.05.018.  
10  
11 5 14. Farrell PM, White TB, Howenstine MS, Munck A, Parad RB, Rosenfeld M, et al. Diagnosis of  
12  
13 6 Cystic Fibrosis in Screened Populations. J Pediatr. 2017.  
14  
15 7 15. Sands BE. Biomarkers of Inflammation in Inflammatory Bowel Disease. Gastroenterology.  
16  
17 8 2015.  
18  
19 9 16. Rumman N, Sultan M, El-Chammas K, Goh V, Salzman N, Quintero D, et al. Calprotectin in  
20  
21 10 Cystic Fibrosis. BMC Pediatr. 2014.  
22  
23 11 17. De Lisle RC, Borowitz D. The cystic fibrosis intestine. Cold Spring Harb Perspect Med. 2013.  
24  
25 12 18. Sankararaman S, Schindler T, Sferra TJ. Management of Exocrine Pancreatic Insufficiency in  
26  
27 13 Children. Invit Rev Nutr Clin Pract. 2019;34:27–42.  
28  
29 14 19. Bruzzese E, Raia V, Gaudiello G, Polito G, Buccigrossi V, Formicola V, et al. Intestinal  
30  
31 15 inflammation is a frequent feature of cystic fibrosis and is reduced by probiotic administration.  
32  
33 16 Aliment Pharmacol Ther. 2004.  
34  
35 17 20. Enaud R, Hooks KB, Barre A, Barnetche T, Hubert C, Massot M, et al. 2019, 8, 645. J Clin  
36  
37 18 Med. 2019;8:645. doi:10.3390/jcm8050645.  
38  
39 19 21. Brennan GT, Saif MW. Pancreatic Enzyme Replacement Therapy: A Concise Review.  
40  
41 20 22. Rumman N, El-Chammas K, Goh V, Salzman N, Quintero D, Werlin S. Calprotectin in Cystic  
42  
43 21 Fibrosis. 2014. doi:10.1186/1471-2431-14-133.  
44  
45 22 23. Dumoulin EN, Van Biervliet S, Delanghe JR. Trypsin is a Potential Confounder in  
46  
47 23 Calprotectin Results. J Pediatr Gastroenterol Nutr. 2015;61:e19.  
48  
49 24 doi:10.1097/MPG.0000000000000906.  
50  
51 25 24. Stagi S, Tam RY, Van Dorst JM, Mckay I, Coffey M, Ooi CY. Clinical Medicine Intestinal  
52  
53 26 Inflammation and Alterations in the Gut Microbiota in Cystic Fibrosis: A Review of the Current  
54  
55  
56  
57  
58  
59  
60

1  
2  
3  
4  
5  
6  
7  
8  
9  
10  
11  
12  
13  
14  
15  
16  
17  
18  
19  
20  
21  
22  
23  
24  
25  
26  
27  
28  
29  
30  
31  
32  
33  
34  
35  
36  
37  
38  
39  
40  
41  
42  
43  
44  
45  
46  
47  
48  
49  
50  
51  
52  
53  
54  
55  
56  
57  
58  
59  
60

1 Evidence, Pathophysiology and Future Directions. *J Clin Med.* 2022;2022:649.

2 25. Ahmed N, Corey M, Forstner G, Zielenski J, Tsui LC, Ellis L, et al. Molecular consequences of  
3 cystic fibrosis transmembrane regulator (CFTR) gene mutations in the exocrine pancreas. *Gut.*  
4 2003;52:1159–64.

5 26. Koninckx CR, Donat E, Benninga MA, Broekaert IJ, Gottrand F, Kolho KL, et al. The Use of  
6 Fecal Calprotectin Testing in Paediatric Disorders: A Position Paper of the European Society for  
7 Paediatric Gastroenterology and Nutrition Gastroenterology Committee. *J Pediatr*  
8 *Gastroenterol Nutr.* 2021;72:617–40.

9 27. Neutra MR, Trier JS. Rectal Mucosa in Cystic Fibrosis: Morphological features before and  
10 after short term organ culture. *Gastroenterology.* 1978.

11  
12  
13  
14  
15

**Table 1. Genotype, body mass index, gastrointestinal symptoms, fecal calprotectin and rectal histology of patients with cystic fibrosis.**

| no. | Genotype          | BMI z-score<br>kg/m <sup>2</sup> | Pancreatic<br>function | Abdominal<br>pain | Diarrhea | Constipation | Calprotectin<br>(µg/g) | Histology    |
|-----|-------------------|----------------------------------|------------------------|-------------------|----------|--------------|------------------------|--------------|
| 1   | F508del/R334W     | -0,42                            | PS                     | yes               | no       | no           | 19                     | normal       |
| 2   | F508del/R334W     | 1,18                             | PS                     | no                | no       | no           | 15                     | normal       |
| 3   | F508del/R334W     | 0,94                             | PS                     | yes               | no       | yes          | 79                     | normal       |
| 4   | F508del/711+1G-T  | -0,74                            | PI                     | no                | no       | yes          | 9                      | normal       |
| 5   | F508del/711+1G-T  | -1,99                            | PI                     | no                | no       | no           | 19                     | normal       |
| 6   | F508del/2184insA  | -4,95                            | PI                     | yes               | yes      | no           | 45                     | normal       |
| 7   | F508del/c.3321dup | -0,22                            | PI                     | no                | no       | no           | 341                    | inflammation |
| 8   | F508del/P5L       | -0,3                             | PS                     | no                | no       | no           | 40                     | normal       |
| 9   | F508del/F508del   | -2,37                            | PI                     | no                | no       | no           | 223                    | inflammation |
| 10  | F508del/F508del   | -2,6                             | PI                     | no                | no       | no           | 62                     | inflammation |
| 11  | F508del/F508del   | -0,3                             | PI                     | yes               | no       | yes          | 63                     | inflammation |
| 12  | F508del/F508del   | -0,64                            | PI                     | no                | no       | no           | 55                     | -            |
| 13  | F508del/F508del   | 0,3                              | PI                     | no                | no       | no           | 90                     | -            |
| 14  | F508del/F508del   | 0,1                              | PI                     | no                | no       | no           | 352                    | -            |
| 15  | F508del/F508del   | -0,27                            | PI                     | no                | yes      | no           | 347                    | -            |
| 16  | F508del/F508del   | -0,13                            | PI                     | no                | no       | no           | 116                    | -            |
| 17  | F508del/F508del   | 0,1                              | PI                     | no                | no       | no           | 101                    | -            |
| 18  | F508del/F508del   | 0,55                             | PI                     | yes               | yes      | no           | 104                    | -            |
| 19  | F508del/F508del   | 1,42                             | PI                     | no                | no       | no           | 88                     | -            |
| 20  | F508del/F508del   | -1,16                            | PI                     | no                | no       | no           | 142                    | -            |
| 21  | F508del/F508del   | 0,03                             | PI                     | no                | no       | no           | 55                     | -            |
| 22  | F508del/F508del   | 1,1                              | PI                     | no                | no       | no           | 330                    | -            |
| 23  | F508del/F508del   | 1,2                              | PI                     | no                | no       | no           | 289                    | -            |

BMI – Body mass index; m- months; PI – pancreatic insufficiency; PS-pancreatic sufficiency

**Table 2. Association between gastrointestinal symptoms and meconium ileus past history and normal or elevated fecal calprotectin.**

| n=23           | Normal calprotectin<br>(n=6) |    | Elevated calprotectin<br>(n=17) |    | p-value# |
|----------------|------------------------------|----|---------------------------------|----|----------|
|                | yes                          | no | yes                             | no |          |
| Abdominal pain | 2                            | 4  | 3                               | 14 | 0.58     |
| Diarrhea       | 0                            | 6  | 3                               | 14 | 1        |
| Constipation   | 2                            | 4  | 1                               | 16 | 1        |
| Meconium ileus | 1                            | 5  | 4                               | 13 | 1        |

#Fisher exact test

**Table 3. Comparison of histologic rectal inflammation presence between patients with normal or elevated fecal calprotectin.**

| (n=11)               | Normal calprotectin<br>n=6 |    | Elevated calprotectin<br>n=5 |    |
|----------------------|----------------------------|----|------------------------------|----|
|                      | yes                        | no | yes                          | no |
| Mucosal inflammation | 0                          | 6  | 4                            | 1  |

#Fisher exact test p-value=0.015

**Figure 1 – A** - Histologic features of patient 8 (F508del/c.3321dup) showing mild to moderate focal inflammation, composed of plasma cells and small lymphocytes, in the mucosa, H&E 200x. **B** - Histologic features of patient 9 (F508del/F508del) showing mild focal inflammation of mononucleated cells of the mucosa in a vaguely nodular pattern (blue arrow), H&E 40x; **C** - Histologic features of patient 10 (F508del/F508del) showing mild focal inflammation of the mucosa, with small lymphocytes and plasma cells, between colonic crypts (blue arrow), H&E 40x, highlighted in higher magnification **D**, H&E 200x.

1  
2  
3  
4  
5  
6  
7  
8  
9  
10  
11  
12  
13  
14  
15  
16  
17  
18  
19  
20  
21  
22  
23  
24  
25  
26  
27  
28  
29  
30  
31  
32  
33  
34  
35  
36  
37  
38  
39  
40  
41  
42  
43  
44  
45  
46  
47  
48  
49  
50  
51  
52  
53  
54  
55  
56  
57  
58  
59  
60

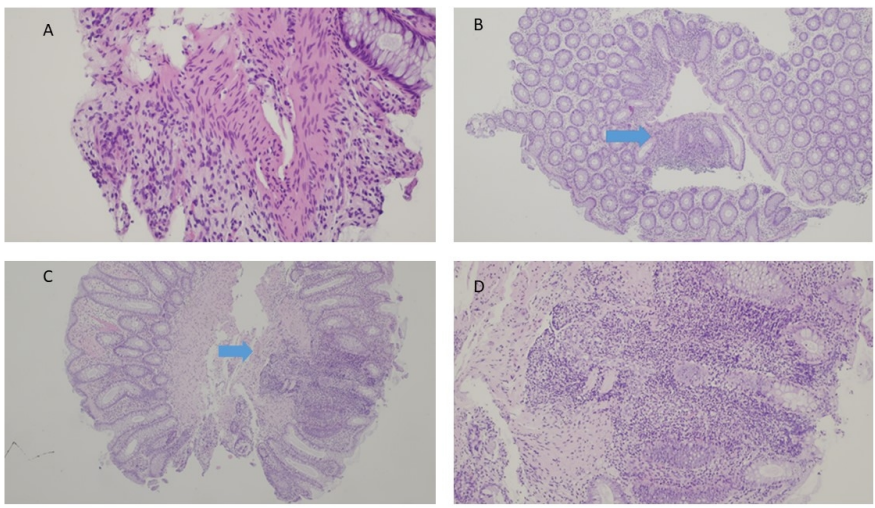

338x190mm (96 x 96 DPI)

# BMJ Paediatrics Open

## Fecal calprotectin and rectal histologic inflammatory markers in cystic fibrosis - single centre study

|                               |                                                                                                                                                                                                                                                                                                                                                                                                                                                                                                                                                                                                                                                                                                                                                                                                                                                                                                                                                                                                                                                                                                                                                                                                                                                             |
|-------------------------------|-------------------------------------------------------------------------------------------------------------------------------------------------------------------------------------------------------------------------------------------------------------------------------------------------------------------------------------------------------------------------------------------------------------------------------------------------------------------------------------------------------------------------------------------------------------------------------------------------------------------------------------------------------------------------------------------------------------------------------------------------------------------------------------------------------------------------------------------------------------------------------------------------------------------------------------------------------------------------------------------------------------------------------------------------------------------------------------------------------------------------------------------------------------------------------------------------------------------------------------------------------------|
| Journal:                      | <i>BMJ Paediatrics Open</i>                                                                                                                                                                                                                                                                                                                                                                                                                                                                                                                                                                                                                                                                                                                                                                                                                                                                                                                                                                                                                                                                                                                                                                                                                                 |
| Manuscript ID                 | bmjpo-2022-001422.R2                                                                                                                                                                                                                                                                                                                                                                                                                                                                                                                                                                                                                                                                                                                                                                                                                                                                                                                                                                                                                                                                                                                                                                                                                                        |
| Article Type:                 | Original research                                                                                                                                                                                                                                                                                                                                                                                                                                                                                                                                                                                                                                                                                                                                                                                                                                                                                                                                                                                                                                                                                                                                                                                                                                           |
| Date Submitted by the Author: | 10-Apr-2022                                                                                                                                                                                                                                                                                                                                                                                                                                                                                                                                                                                                                                                                                                                                                                                                                                                                                                                                                                                                                                                                                                                                                                                                                                                 |
| Complete List of Authors:     | <p>Roda, Juliana; Centro Hospitalar e Universitario de Coimbra EPE Hospital Pediátrico de Coimbra, Pediatric Gastroenterology and Nutrition Unit; Universidade de Coimbra Faculdade de Medicina, Clínica Universitária de Pediatria</p> <p>Maia, Carla; Centro Hospitalar e Universitario de Coimbra EPE Hospital Pediátrico de Coimbra, Pediatric Gastroenterology and Nutrition Unit</p> <p>Almeida, Susana; Centro Hospitalar e Universitario de Coimbra EPE Hospital Pediátrico de Coimbra, Pediatric Gastroenterology and Nutrition Unit</p> <p>Oliveira, Rui ; Centro Hospitalar e Universitário de Coimbra EPE, Pathology Department; Universidade de Coimbra Faculdade de Medicina, Coimbra Institute for Clinical and Biomedical Research (iCBR) Area of Environment Genetics and Oncobiology (CIMAGO)</p> <p>Ferreira, Ricardo; Centro Hospitalar e Universitario de Coimbra EPE Hospital Pediátrico de Coimbra, Pediatric Gastroenterology and Nutrition Unit</p> <p>Oliveira, Guiomar; Centro Hospitalar e Universitario de Coimbra EPE Hospital Pediátrico de Coimbra, Centro de Desenvolvimento da Criança e Centro de Investigação e Formação Clínica; Universidade de Coimbra Faculdade de Medicina, Clínica Universitária de Pediatria</p> |
| Keywords:                     | Cystic Fibrosis, Gastroenterology                                                                                                                                                                                                                                                                                                                                                                                                                                                                                                                                                                                                                                                                                                                                                                                                                                                                                                                                                                                                                                                                                                                                                                                                                           |
|                               |                                                                                                                                                                                                                                                                                                                                                                                                                                                                                                                                                                                                                                                                                                                                                                                                                                                                                                                                                                                                                                                                                                                                                                                                                                                             |

SCHOLARONE™  
Manuscripts



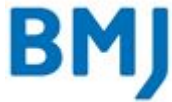

I, the Submitting Author has the right to grant and does grant on behalf of all authors of the Work (as defined in the below author licence), an exclusive licence and/or a non-exclusive licence for contributions from authors who are: i) UK Crown employees; ii) where BMJ has agreed a CC-BY licence shall apply, and/or iii) in accordance with the terms applicable for US Federal Government officers or employees acting as part of their official duties; on a worldwide, perpetual, irrevocable, royalty-free basis to BMJ Publishing Group Ltd ("BMJ") its licensees and where the relevant Journal is co-owned by BMJ to the co-owners of the Journal, to publish the Work in this journal and any other BMJ products and to exploit all rights, as set out in our [licence](#).

The Submitting Author accepts and understands that any supply made under these terms is made by BMJ to the Submitting Author unless you are acting as an employee on behalf of your employer or a postgraduate student of an affiliated institution which is paying any applicable article publishing charge ("APC") for Open Access articles. Where the Submitting Author wishes to make the Work available on an Open Access basis (and intends to pay the relevant APC), the terms of reuse of such Open Access shall be governed by a Creative Commons licence – details of these licences and which [Creative Commons](#) licence will apply to this Work are set out in our licence referred to above.

Other than as permitted in any relevant BMJ Author's Self Archiving Policies, I confirm this Work has not been accepted for publication elsewhere, is not being considered for publication elsewhere and does not duplicate material already published. I confirm all authors consent to publication of this Work and authorise the granting of this licence.

1  
2  
3 1 **Title: Fecal calprotectin and rectal histologic inflammatory markers in cystic fibrosis – a**  
4  
5 2 **single centre study**  
6  
7

8 3 **Authors:**  
9

10 4 **Corresponding author:**  
11

12  
13 5 **Juliana Roda**  
14

15 6 **MD**  
16

17  
18 7 Pediatric Gastroenterology and Nutrition Unit, Hospital Pediátrico - Centro Hospitalar e  
19

20 8 Universitário de Coimbra, Coimbra, Portugal  
21

22 9 Avenida Afonso Romão, 3000-602 Coimbra, Portugal  
23

24  
25 10 Telephone: +351 962748392  
26

27 11 Email: [juroda@hotmail.com](mailto:juroda@hotmail.com)  
28

29 12 <https://orcid.org/0000-0001-8990-779X>  
30  
31  
32

33 14 **Carla Maia**  
34

35 15 **MD**  
36

37  
38 16 Pediatric Gastroenterology and Nutrition Unit, Hospital Pediátrico - Centro Hospitalar e  
39

40 17 Universitário de Coimbra, Coimbra, Portugal  
41

42 18 Email: [carla.maia@chuc.min-saude.pt](mailto:carla.maia@chuc.min-saude.pt)  
43  
44  
45  
46

47 20 **Susana Almeida**  
48

49 21 **MD**  
50

51 22 Pediatric Gastroenterology and Nutrition Unit, Hospital Pediátrico - Centro Hospitalar e  
52

53 23 Universitário de Coimbra, Coimbra, Portugal  
54

55  
56 24 Email: [susana.almeida.coimbra@gmail.com](mailto:susana.almeida.coimbra@gmail.com)  
57  
58  
59  
60

1  
2  
3  
4  
5  
6  
7  
8  
9  
10  
11  
12  
13  
14  
15  
16  
17  
18  
19  
20  
21  
22  
23  
24  
25  
26  
27  
28  
29  
30  
31  
32  
33  
34  
35  
36  
37  
38  
39  
40  
41  
42  
43  
44  
45  
46  
47  
48  
49  
50  
51  
52  
53  
54  
55  
56  
57  
58  
59  
60

1  
2  
3  
4  
5  
6  
7  
8  
9  
10  
11  
12  
13  
14  
15  
16  
17  
18  
19  
20  
21  
22  
23  
24  
25  
26  
27  
28  
29  
30  
31  
32  
33  
34  
35  
36  
37  
38  
39  
40  
41  
42  
43  
44  
45  
46  
47  
48  
49  
50  
51  
52  
53  
54  
55  
56  
57  
58  
59  
60

**Rui Caetano Oliveira**

**MD, PhD**

Pathology Department, Centro Hospitalar e Universitário de Coimbra, Portugal; Biophysics Institute, Faculty of Medicine, University of Coimbra, 3000-548, Portugal  
Coimbra Institute for Clinical and Biomedical Research (iCBR) Area of Environment Genetics and Oncobiology (CIMAGO), Faculty of Medicine, University of Coimbra, 3000-548, Coimbra, Portugal  
Email: ruipedrocoliveira@hotmail.com

**Ricardo Ferreira**

**MD**

Pediatric Gastroenterology and Nutrition Unit, Hospital Pediátrico - Centro Hospitalar e Universitário de Coimbra, Coimbra, Portugal  
Email: ricardo.ferreira@chuc.min-saude.pt

**Guiomar Oliveira**

**MD, PhD**

Centro de Desenvolvimento da Criança e Centro de Investigação e Formação Clínica, Hospital Pediátrico – Centro Hospitalar e Universitário de Coimbra, Coimbra, Portugal  
Clínica Universitária de Pediatria, Faculdade de Medicina da Universidade de Coimbra, Coimbra, Portugal  
Email: guiomar@chuc.min-saude.pt  
<https://orcid.org/0000-0002-7049-1277>

**Word count:** 2687 words

**1 ABSTRACT**

2 Objective: To analyze the association of fecal calprotectin with the genetic and clinical  
3 characteristics of pediatric patients with cystic fibrosis (PwCF). In a subset of these patients, we  
4 aimed to associate histologic inflammatory features of rectal mucosa to fecal calprotectin  
5 levels.

6 Methods: In a prospective study, fecal calprotectin levels were collected in all 23 PwCF  
7 attending our pediatric center, together with demographic and clinical data. Associations  
8 between fecal calprotectin and clinical features were determined. In 11 of these patients,  
9 endoscopic rectal biopsies were obtained and the association between fecal calprotectin and  
10 histologic inflammatory markers was analyzed. Statistical analyses included Spearman's  
11 correlation coefficient, Mann-Whitney and Exact Fisher tests. Sensitivity and specificity was  
12 calculated.

13 Results: Median age of PwCF was 12 years, 19 had pancreatic insufficiency (PI) (19/23).  
14 Seventeen (17/23) had elevated fecal calprotectin, and the median value was 88  $\mu\text{g/g}$   
15 (IQR=178  $\mu\text{g/g}$ ). Higher fecal calprotectin levels were observed in the PI group (101 vs 30  $\mu\text{g/g}$ ,  
16  $P=0.027$ ). No significant correlation between elevated fecal calprotectin level and BMI z-score  
17 was found. Five patients (22%) reported abdominal pain, three (13%) complained of diarrhea  
18 and three (13%) had constipation, but these symptoms were not associated with elevated  
19 fecal calprotectin.

20 Unspecific focal rectal inflammation was found in four patients (4/11). An association between  
21 rectal mucosa inflammation and elevated fecal calprotectin was found ( $p=0.015$ ). Sensitivity  
22 was 100% and specificity was 86%.

23 Conclusions: In our PwCF, elevated fecal calprotectin was frequent, particularly if PI, and it was  
24 not related to gastrointestinal symptoms or malnutrition. Elevated fecal calprotectin was

1 present in patients with histologic evidence of rectal inflammation. Fecal calprotectin may be  
2 an indicator of asymptomatic rectal inflammation in PwCF.

3

4 **Keywords:** cystic fibrosis, gastroenterology

5 **What is already known on this topic:**

- 6 • There is increasing evidence of intestinal inflammation in cystic fibrosis (CF)
- 7 • Elevated fecal calprotectin has been found in CF patients

8 **What this study adds:**

- 9 • Elevated fecal calprotectin is frequent, particularly if pancreatic insufficient patients  
10 with CF
- 11 • Focal inflammation in rectal biopsies was found in CF patients and it is associated to  
12 elevated fecal calprotectin

13 **How this study might affect research, practice or policy:** Fecal calprotectin may be used as an  
14 indicator of rectal inflammation in CF

15 **List of abbreviations:**

16 BMI - Body mass index

17 CF - Cystic fibrosis

18 CFTR - Cystic Fibrosis Transmembrane conductance Regulator

19 IQR – Interquartile range

20 PERT - pancreatic enzyme replacement therapy

21 PI - Pancreatic insufficiency

22 PS - pancreatic sufficient

## 1 INTRODUCTION

2 Cystic fibrosis (CF) is a severe autosomal recessive disease that results from mutations in a  
3 gene encoding the cystic fibrosis transmembrane conductance regulator (CFTR) protein, a  
4 chloride channel [1]. It is the most common life-limiting genetic disease among Caucasians,  
5 occurring in 1 of 2500 live births worldwide. In Portugal, a prevalence of 0.27 per 10,000  
6 inhabitants and an incidence of 1 per 7500 newborns have been estimated [2, 3].

7 CF is also the most common cause of pancreatic insufficiency (PI) in children [4]. Historically,  
8 CF children died in infancy from severe malnutrition and later from respiratory failure, but due  
9 to improved clinical care, including pancreatic enzyme replacement therapy (PERT), currently,  
10 a majority of them reach adulthood [5]. Approximately 85% of CF patients have impaired  
11 digestion due to PI and despite adequate PERT, several CF patients still have malabsorption,  
12 growth impairment and gastrointestinal problems, including abdominal pain, steatorrhea, and  
13 altered motility [4, 5]. It has been suggested that digestive symptoms are attributable not only  
14 to PI but also to intestinal inflammation. However, the pathogenesis and nutritional  
15 implications of this finding remains unclear [5].

16 Studies, in both animals and humans, have reported evidence of intestinal inflammation in CF.  
17 In the mouse model of CF, the most common manifestation is intestinal obstruction resulting  
18 from inflammatory enteropathy, leading to perforation [6]. Furthermore, abnormal mucus  
19 accumulation in the intestines of murine models predisposes them to gut dysmotility, creating  
20 a niche for bacterial overgrowth and dysbiosis [7].

21 In humans, the presence of inflammatory biomarkers, including fecal calprotectin, eosinophil  
22 cationic protein, interleukin-1B and interleukin-8, was reported, suggesting that intestinal  
23 inflammation is a feature of CF [5, 8]. Videocapsule endoscopic studies elicited mucosal  
24 ulceration, erythema and mucosal breaks in the small bowel of CF patients, particularly those  
25 with PI [4]. Calprotectin is a neutrophil secretory product, and elevated fecal levels are well  
26 correlated with colonic inflammation in inflammatory bowel disease [9–11]. Dysbiosis may be

1 associated with intestinal inflammation as reflected by increased levels of fecal calprotectin  
2  
3  
4  
5 2 that respond to antibiotic treatment [12]. CFTR modulators may potentially improve dysbiosis  
6  
7  
8 3 and inflammation, for example ivacaftor has been associated with a decrease in calprotectin  
9  
10 4 levels[13].

11  
12 5 However, to our knowledge, there are no studies characterizing intestinal histological  
13  
14 6 inflammatory findings in CF patients and, particularly, studies analysing the relationship  
15  
16 7 between elevated fecal calprotectin and these histologic inflammatory findings.

17  
18 8 The aim of the present study was to analyze, in a cohort of pediatric CF patients, the  
19  
20 9 association between fecal calprotectin levels and genetic and clinical characteristics, including  
21  
22 10 nutritional status and gastrointestinal symptoms. In a subset of this cohort, we also aimed to  
23  
24 11 characterize histological inflammatory features of rectal mucosa and relate it to fecal  
25  
26 12 calprotectin levels.

## 13 **METHODS**

14 This prospective study included children and adolescents aged 0 to 18 years followed in the  
15  
16 15 Pediatric Unit of the Cystic Fibrosis Reference Centre of the Centro Hospitalar e Universitário  
17  
18 16 de Coimbra, Portugal, in the year 2019. The criteria for the diagnosis of CF were: clinical  
19  
20 17 characteristics compatible with CF, a positive sweat test and a genetic study with the  
21  
22 18 identification of two disease-causing mutations, according to the latest consensus [14]. All  
23  
24 19 patients willing to participate were included. Exclusion criteria included recent respiratory  
25  
26 20 exacerbation/infection or ingestion of antibiotics, steroids or nonsteroidal anti-inflammatory  
27  
28 21 drugs, both in the previous 4 weeks.

29  
30 22 In all participants, demographic data, genotype and clinical data, including nutritional status  
31  
32 23 and PERT medication, were collected at the time of the appointment where stool sample was  
33  
34 24 obtained. Nutritional status was assessed according to the z-score of weight, height, and body  
35  
36 25 mass index (BMI). Patients were asked whether they had experienced gastrointestinal  
37  
38  
39  
40  
41  
42  
43  
44  
45  
46  
47  
48  
49  
50  
51  
52  
53  
54  
55  
56  
57  
58  
59  
60

1 symptoms (abdominal pain, constipation or diarrhea) in the two weeks preceding the  
2 calprotectin measurement.

3 Exocrine pancreatic function was assessed using fecal elastase levels. PI was considered when  
4 the fecal elastase level was under 200  $\mu\text{g/g}$ ; above that, they were classified as pancreatic  
5 sufficient (PS).

### 6 7 **Fecal calprotectin measurement**

8 Stool samples were collected at home or at the CF Reference Centre. Calprotectin level in the  
9 fecal samples were measured using EliA Calprotectin<sup>®</sup> (reagents from Thermo Fisher  
10 Scientific<sup>®</sup>). Fecal calprotectin concentration was considered normal up to 50  $\mu\text{g/g}$  stool, as  
11 was considered in previous studies with CF patients [4] and as it has been shown to be  
12 sensitive for detecting inflammation in children with inflammatory bowel disease [15].

### 13 14 **Rectal biopsies**

15 Rectal biopsies were obtained, from patients already enrolled in another study from our  
16 center, which aimed to test CFTR modulator responses in intestinal organoids from patients  
17 with rarer mutations (data not yet published; *UID/MULTI/04046/2019*). As a consequence,  
18 most of these patients had less common mutations. Time between fecal calprotectin  
19 measurement and rectal biopsies was a maximum of two days.

20 Rectal mucosa specimens (3-4 mm in diameter) were obtained from eleven patients, with or  
21 without sedation (depending on individuals will or collaboration) using a colonoscope and  
22 colon forceps (Endoflex<sup>®</sup>, diameter 2.8 mm). Samples were immediately stored in formalin.

23 One pathologist with experience in gastrointestinal pathology from the Pathology Department,  
24 Centro Hospitalar e Universitário de Coimbra, Portugal performed the histologic analysis.  
25 Samples were blinded to the clinical information and were analyzed under an optical



1  
2  
3 1 microscope (Nikon Eclipse 50i®). Pictures were taken with a Nikon-Digital Sight DS-Fi1® digital  
4  
5 2 camera.

6  
7 3 Since the diagnosis of CF is based mainly on bioelectrical/biochemical analyses, there is no  
8  
9 4 defined standard histological classification score. Therefore, the evaluation took into  
10  
11 5 consideration the density of mononucleated inflammatory population, on a semi quantitative  
12  
13 6 approach: none, mild, moderate and severe.  
14  
15

### 16 7 17 18 8 **Statistical Analysis**

19  
20 9 Statistical analyses were performed with SPSS software (v.19; SPSS Inc., Chicago, IL, USA), and  
21  
22 10 a p value < 0.05 was considered statistically significant. Descriptive statistics were presented  
23  
24 11 according to the normality of the data distribution using Shapiro-Wilk test. Spearman's  
25  
26 12 correlation coefficient, Mann-Whitney and Exact Fisher tests were used between patient  
27  
28 13 groups to evaluate correlation, differences and associations, respectively. Sensitivity and  
29  
30 14 specificity of calprotectin as a marker of rectal inflammation was calculated.  
31  
32  
33  
34  
35

### 36 16 **Ethics Approval**

37  
38 17 The present study was performed in accordance with the Declaration of Helsinki and approved  
39  
40 18 by the board of the Centro Hospitalar e Universitário de Coimbra (Portugal) after a favorable  
41  
42 19 report by the Health Ethics Committee (Ref. CHUC-080-16). Informed consent was obtained by  
43  
44 20 all participants aged over 16 years or by their parents or legal guardians if under 16 years old.  
45  
46  
47  
48  
49

### 50 22 **Patient involvement**

51  
52 23 Patients were not directly involved in setting the research question, the design or in the  
53  
54 24 implementation of the project.  
55  
56  
57  
58  
59  
60

1

2 **RESULTS**

3 Fecal calprotectin was measured in all 23 PwCF followed in our center during one year. The  
4 median age was 12 years, aged from 2 months to 17 years old. Twelve were male. All patients  
5 with PI (19/23, 83%) were taking PERT. The F508del mutation was present in all patients in at  
6 least one allele. Fifteen (65%) patients were F508del homozygous, and the others carried one  
7 of the following mutations: R334W (n=3), 711+ 1G->T (n=2), and 2184insA (n=1), P5L (n=1) and  
8 a novel mutation, c.3321dup (n=1) (Table 1). Only two patients were taking CFTR modulator  
9 lumacaftor/ivacaftor (patient 15 and patient 20, presenting fecal calprotectin level of 347 and  
10 142 µg/g, respectively). Sweat test of these patients did not improve with modulator drug.  
11 Seventeen of the 23 patients (74%) had an elevated fecal calprotectin measurement, and the  
12 median value was 88 µg/g (IQR=178 µg/g). Most patients (16/19) with PI had elevated fecal  
13 calprotectin (84%). The PI group had higher fecal calprotectin levels than in the PS group (101  
14 µg/g; IQR=234 vs 30 µg/g; IQR=53; p=0.0027).

15 A moderate positive correlation was found between fecal calprotectin and sweat test values  
16 (from the time of diagnosis) (r=0.46; p=0.029). A weak negative correlation was found  
17 between age and fecal calprotectin (r=-0.3; p=0.14). Also meconium ileus past history was not  
18 associated with elevated calprotectin (Table 2).

19 Comparing the median BMI z-score in patients with normal and elevated fecal calprotectin, no  
20 significant difference was found (-0.58 kg/m<sup>2</sup>; IQR= 2.8 vs 0.1 kg/m<sup>2</sup>; IQR=1.08; p=0.09). No  
21 significant correlation between fecal calprotectin level and BMI z-score was found (r=0.19;  
22 p=0.36).

23 All 15 patients homozygous for the F508del mutation had elevated fecal calprotectin. These  
24 PwCF have a statistically significant higher fecal calprotectin than F508del heterozygous  
25 patients (110 µg/g; IQR=217 vs 40 µg/g; IQR=54, p=0.003).

1  
2  
3 1 Some CF patients reported digestive symptoms: five patients (22%) reported abdominal pain,  
4  
5 2 three (13%) complained of diarrhea, and three (13%) had constipation (Table 1).  
6  
7 3 Gastrointestinal symptoms were not associated with elevated fecal calprotectin (Table 2).  
8  
9  
10 4

## 11 5 **Histologic features**

12 6 Rectal biopsies were obtained from 11 of the 23 PwCF. Eight patients had the rarer mutations  
13  
14 7 R334W (n=3), 711+1G-T (n=2), P5L (n=1), c.3321dup (n=1) and 2184insA (n=1), and three  
15  
16 8 patients were homozygous for the F508del mutation.  
17  
18  
19

20 9 Unspecific mild focal inflammation was found in the three F508del homozygous patients, all of  
21  
22 10 which had elevated fecal calprotectin (Table 1). Inflammatory features were characterized as  
23  
24 11 small lymphocyte and plasma cell infiltrates distributed in a vaguely nodular pattern between  
25  
26 12 colonic crypts (Figure 1 – B, C and D).  
27  
28

29 13 Mild to moderate focal inflammation composed of plasma cells and small lymphocytes in the  
30  
31 14 mucosa was found in the patient carrying F508del in one allele and the new mutation  
32  
33 15 c.3321dup in the other allele (Figure 1 – A). This patient had significantly elevated fecal  
34  
35 16 calprotectin (341 µg/g) (patient 7; Table 1).  
36  
37

38 17 There was an association between elevated fecal calprotectin levels and the presence of  
39  
40 18 inflammation in rectal biopsies (Table 3). In our study, sensitivity of calprotectin levels was  
41  
42 19 100% and specificity was 86%.  
43  
44

45 20 Median calprotectin was higher in PwCF with histological inflammatory alterations comparing  
46  
47 21 with PwCF with normal histology (143 µg/g; IQR=249 vs 19 µg/g; IQR=30; p=0.024). None of  
48  
49 22 the mucosal samples had architectural changes, which are a major sign of chronic  
50  
51 23 inflammation.  
52  
53

## 54 24 55 25 **DISCUSSION**

1  
2  
3 1 Most patients from this study (78%) had an elevated fecal calprotectin level, some reaching a  
4  
5 2 maximum level of more than 300 µg/g. This is consistent with previous studies and suggests  
6  
7 3 the presence of intestinal inflammation in PwCF [4, 5, 16]. The pathophysiology of intestinal  
8  
9 4 inflammation may be explained by the same triad of obstruction by mucus accumulation,  
10  
11 5 inflammation and infection that causes disease in the airways of PwCF [17]. The *CFTR* gene is  
12  
13 6 strongly expressed all along the intestinal tract in a cephalad-caudal gradient, *CFTR* messenger  
14  
15 7 RNA levels are highest in the duodenum and levels decrease distally along the small intestine  
16  
17 8 to the large intestine [17]. This “CF enteropathy” may be an independent entity in the disease  
18  
19 9 process or may be due to other factors. High doses of PERT can cause inflammation and  
20  
21 10 fibrosing colonopathy[18]. Inspissated intestinal secretions, mucus accumulation, constipation,  
22  
23 11 slow intestinal motility, the use of proton pump inhibitors and frequent courses of antibiotics  
24  
25 12 are multiple risk factors for small bowel bacterial overgrowth in CF patients, which can cause  
26  
27 13 inflammation, mucosal damage and aggravate maldigestion [16]. An unfavorable intestinal  
28  
29 14 microbiome may also be a stimulus for inflammation [19, 20]. One trial with probiotics  
30  
31 15 supported this hypothesis, as the use of *Lactobacillus rhamnosus GG* reduced calprotectin  
32  
33 16 concentrations in CF children [19]. Another study, found increased abundances of  
34  
35 17 *Staphylococcus*, *Streptococcus*, and *Veillonella dispar*, along with decreased abundances of  
36  
37 18 *Bacteroides*, *Bifidobacterium adolescentis*, and *Faecalibacterium prausnitzii* to be associated  
38  
39 19 to intestinal inflammation in PwCF in similarity to changes found in patients with Crohn’s  
40  
41 20 disease [20].  
42  
43  
44  
45  
46  
47  
48 21 In our study, lower fecal calprotectin levels were found in PS patients. Elevated fecal  
49  
50 22 calprotectin only in PI patients has also been reported by Dhaliwal *et al* [5]. On the other hand,  
51  
52 23 sixteen of nineteen patients with PI had elevated fecal calprotectin, and the difference in fecal  
53  
54 24 calprotectin levels between the PI and PS groups was impressive (101 vs 30 µg/g). This means  
55  
56 25 that either PI by itself or PERT may be responsible for intestinal inflammation in these  
57  
58 26 patients[21]. However, there has been reported a lack of correlation between PERT and fecal  
59  
60

1 calprotectin[22]. As reported by Dumoulin *et al.*, calprotectin is subject to proteolysis by tripsin  
2 activity, which is virtually absent in PI PwCF. As a result, calprotectin proteolysis is also  
3 reduced. Therefore, calprotectin levels detected in stools of PI patients may be higher, and this  
4 may not be exclusively attributed to intestinal inflammation[23]. Perhaps, in PI PwCF, the  
5 upper limit of the considered "normal" fecal calprotectin should be higher than the value  
6 considered for inflammatory bowel disease, as no association was found with digestive  
7 symptoms [23, 24]. Some recent studies suggest an upper limit of >50 µg/g or 250 µg/g and it  
8 remains unclear whether reference ranges that are useful in IBD are equally applicable in  
9 CF[20, 24]. Also, the pancreatic status is related to CFTR function and genotype and intestinal  
10 inflammation may be another manifestation of the multisystemic involvement of the disease  
11 and not only influenced by pancreatic function [25].

12 Another interesting finding was that PwCF F508del homozygous have significantly higher  
13 calprotectin levels in comparison to heterozygotes. This genotype may be associated with an  
14 increased risk of more significant intestinal inflammation.

15 Overall, only a small number of patients complained of gastrointestinal symptoms, and no  
16 association between elevated calprotectin and digestive symptoms could be found. The same  
17 conclusion has been reported even in studies where digestive symptoms were much more  
18 frequent[22].

19 In contrast to previous studies [5], no relationship could be found between fecal calprotectin  
20 and nutritional status or growth parameters. However, interestingly, a positive correlation was  
21 found between fecal calprotectin and sweat test values, which may be indicative of the  
22 presence of significant intestinal inflammation in patients with a more severe phenotype. The  
23 negative correlation found between fecal calprotectin and age is in line with the reported  
24 tendency towards lower values with increasing age in healthy individuals, even though there  
25 are no well-established cut off levels for specific age ranges[26]. However, it is in contrast with

1  
2  
3 1 some studies that found an increase in calprotectin with age in patients with CF, particularly in  
4  
5 2 those with severe disease[27–29].  
6

7  
8 3 Historically, distinct histological changes, which have been interpreted as signs of mucus  
9  
10 4 hypersecretion, have been reported in light microscopic studies of large intestinal mucosa  
11  
12 5 from CF patients. "Hypertrophic" or enlarged goblet cells and crypts distended by accumulated  
13  
14 6 mucus were described, and these changes were considered useful in the diagnosis of CF by  
15  
16 7 some authors [30]. In this study we were specifically looking for histologic evidence of  
17  
18 8 inflammation in CF patients and try to associate it to fecal calprotectin.  
19

20  
21 9 Four out of the eleven patients to whom rectal biopsies were performed had histologic  
22  
23 10 inflammatory alterations. Interestingly, all the three patients homozygous for F508del  
24  
25 11 mutation had histological signs of inflammation and this may be related to the severe  
26  
27 12 phenotype associated to this common mutation.  
28

29  
30 13 Elevated calprotectin level was associated with histologic inflammation in the rectal mucosa  
31  
32 14 (Table 3) and PwCF with rectal inflammation had a significantly higher calprotectin level. High  
33  
34 15 sensitivity and specificity, allows us to conclude that fecal calprotectin may be a good indicator  
35  
36 16 of rectal inflammation in PwCF. However, the clinical meaning of this finding remains to be  
37  
38 17 explained, as this did not translate into more frequent gastrointestinal symptoms or influenced  
39  
40 18 nutritional status. However, as the life expectancy of PwCF is increasing there has been  
41  
42 19 reported an increased risk of gastrointestinal malignancies. Chronic intestinal inflammation is a  
43  
44 20 risk factor for cancer development and this should probably be addressed early in life[24].  
45

46  
47 21 We are aware that our study had several limitations: it is a small and unicentric study, and  
48  
49 22 biopsies were performed on a subset of our patients and limited to the rectum. Larger  
50  
51 23 multicenter studies with the aim of determining serial and longitudinal studies of calprotectin  
52  
53 24 levels and biopsies of the upper and lower gastrointestinal tract may help to determine clinical  
54  
55 25 relevance.  
56  
57  
58  
59  
60

1  
2  
3 1 However, the finding of abnormal calprotectin levels and inflammatory alterations in the  
4  
5 2 intestinal mucosa in the pediatric population raises questions about the early detection of CF  
6  
7 3 enteropathy.  
8

9  
10 4 In conclusion, there is increasing evidence that intestinal inflammation is part of CF and is  
11  
12 5 present early in life, particularly in childhood and adolescence. The additional contribution of  
13  
14 6 low trypsin activity, chronic enzyme dosage, dysmotility, bacterial overgrowth, dysbiosis and  
15  
16 7 other unidentified factors may play a role in its multifactorial cause. Fecal calprotectin may be  
17  
18 8 considered a noninvasive biomarker of intestinal inflammation in CF patients since a  
19  
20 9 relationship with histologic evidence of rectal mucosa inflammation was found. Further and  
21  
22 10 larger studies need to be performed to confirm and explain the mechanisms and clinical  
23  
24 11 relevance of these findings.  
25  
26  
27  
28  
29  
30  
31  
32  
33  
34  
35  
36  
37  
38  
39  
40  
41  
42  
43  
44  
45  
46  
47  
48  
49  
50  
51  
52  
53  
54  
55  
56  
57  
58  
59  
60

1  
2  
3 1 **Funding:** This research received no specific grant from any funding agency in the public,  
4 commercial or not-for-profit sectors.  
5  
6  
7  
8  
9

10 4 **Competing interests:** The authors declare that they have no competing interests.  
11  
12  
13

14 6 **Authors' contributions:**

15  
16 7 **JR** conceived and designed the study, collected, analyzed and interpreted the data and wrote  
17 the first draft of the manuscript.  
18  
19

20 9 **CM** interpreted the data and critically reviewed the manuscript

21 10 **SA** interpreted the data and critically reviewed the manuscript.  
22

23 11 **RCO** prepared Figure 1 and analyzed and interpreted the data  
24

25 12 **RF** analyzed and interpreted the data and critically reviewed the manuscript.  
26  
27

28 13 **GO** critically reviewed the manuscript  
29

30 14 **Acknowledgements:** Not applicable  
31  
32  
33  
34  
35  
36

37 16 **Ethics approval and consent to participate:** The present study was performed in accordance  
38 with the Declaration of Helsinki and approved by the board of the Centro Hospitalar e  
39 Universitário de Coimbra (Portugal) after a favorable report by the Health Ethics Committee  
40 (Ref. CHUC-080-16). Informed consent was obtained by all participants aged over 16 years or  
41 by their parents or legal guardians if under 16 years old.  
42  
43  
44  
45  
46  
47  
48  
49

50 22 **Consent for publication:** Informed consent for publication was obtained by all participants  
51 aged over 16 years or by their parents or legal guardians if under 16 years old.  
52  
53

54 24 **Availability of data and materials:** The datasets used and/or analyzed during the current study  
55 are available from the corresponding author on request.  
56  
57  
58  
59  
60



1  
2  
3 **1 REFERENCES**  
4

- 5 2 1. Elborn JS. Cystic fibrosis. *The Lancet*. 2016.  
6  
7 3 2. Marcão A, Barreto C, Pereira L, Vaz LG, Cavaco J, Casimiro A, et al. Cystic fibrosis newborn  
8 screening in Portugal: PAP value in populations with stringent rules for genetic studies. *Int J*  
9 *Neonatal Screen*. 2018.  
10 4  
11 5 3. Farrell PM. The prevalence of cystic fibrosis in the European Union. *J Cyst Fibros*. 2008.  
12 6  
13 7 4. Werlin SL, Benuri-Silbiger I, Kerem E, Adler SN, Goldin E, Zimmerman J, et al. Evidence of  
14 8 intestinal inflammation in patients with cystic fibrosis. *J Pediatr Gastroenterol Nutr*. 2010.  
15 9  
16 10 5. Dhaliwal J, Leach S, Katz T, Nahidi L, Pang T, Lee JM, et al. Intestinal inflammation and  
17 11 impact on growth in children with cystic fibrosis. *J Pediatr Gastroenterol Nutr*. 2015.  
18 12  
19 13 6. Norkina O, Kaur S, Ziemer D, De Lisle RC. Inflammation of the cystic fibrosis mouse small  
20 14 intestine. *Am J Physiol - Gastrointest Liver Physiol*. 2004.  
21 15  
22 16 7. De Lisle RC. Altered transit and bacterial overgrowth in the cystic fibrosis mouse small  
23 17 intestine. *Am J Physiol - Gastrointest Liver Physiol*. 2007.  
24 18  
25 19 8. Bruzzese E, Callegari ML, Raia V, Viscovo S, Scotto R, Ferrari S, et al. Disrupted intestinal  
26 20 microbiota and intestinal inflammation in children with cystic fibrosis and its restoration with  
27 21 *lactobacillus gg*: A randomised clinical trial. *PLoS One*. 2014.  
28 22  
29 23 9. Summerton CB, Longlands MG, Wiener K, Shreeve DR. Faecal calprotectin: A marker of  
30 24 inflammation throughout the intestinal tract. *Eur J Gastroenterol Hepatol*. 2002.  
31 25  
32 26 10. Montalto M, Santoro L, Curigliano V, D'Onofrio F, Cammarota G, Panunzi S, et al. Faecal  
33 27 calprotectin concentrations in untreated coeliac patients. *Scand J Gastroenterol*. 2007.  
34 28  
35 29 11. García-Sánchez V, Iglesias-Flores E, González R, Gisbert JP, Gallardo-Valverde JM, González-  
36 30 Galilea Á, et al. Does fecal calprotectin predict relapse in patients with Crohn's disease and  
37 31 ulcerative colitis? *J Crohn's Colitis*. 2010.  
38 32  
39 33 12. Schnapp Z, Hartman C, Livnat G, Shteinberg M, Elenberg Y. Decreased Fecal Calprotectin  
40 34 Levels in Cystic Fibrosis Patients after Antibiotic Treatment for Respiratory Exacerbation. *J*  
41 35  
42 36  
43 37  
44 38  
45 39  
46 40  
47 41  
48 42  
49 43  
50 44  
51 45  
52 46  
53 47  
54 48  
55 49  
56 50  
57 51  
58 52  
59 53  
60 54

- 1  
2  
3 1 Pediatr Gastroenterol Nutr. 2019;68:282–4.  
4  
5 2 13. Stallings VA, Sainath N, Oberle M, Bertolaso C, Schall JI. Energy Balance and Mechanisms of  
6  
7 3 Weight Gain with Ivacaftor Treatment of Cystic Fibrosis Gating Mutations. J Pediatr.  
8  
9 4 2018;201:229-237.e4. doi:10.1016/J.JPEDS.2018.05.018.  
10  
11 5 14. Farrell PM, White TB, Howenstine MS, Munck A, Parad RB, Rosenfeld M, et al. Diagnosis of  
12  
13 6 Cystic Fibrosis in Screened Populations. J Pediatr. 2017.  
14  
15 7 15. Sands BE. Biomarkers of Inflammation in Inflammatory Bowel Disease. Gastroenterology.  
16  
17 8 2015.  
18  
19 9 16. Rumman N, Sultan M, El-Chammas K, Goh V, Salzman N, Quintero D, et al. Calprotectin in  
20  
21 10 Cystic Fibrosis. BMC Pediatr. 2014.  
22  
23 11 17. De Lisle RC, Borowitz D. The cystic fibrosis intestine. Cold Spring Harb Perspect Med. 2013.  
24  
25 12 18. Sankararaman S, Schindler T, Sferra TJ. Management of Exocrine Pancreatic Insufficiency in  
26  
27 13 Children. Invit Rev Nutr Clin Pract. 2019;34:27–42.  
28  
29 14 19. Bruzzese E, Raia V, Gaudiello G, Polito G, Buccigrossi V, Formicola V, et al. Intestinal  
30  
31 15 inflammation is a frequent feature of cystic fibrosis and is reduced by probiotic administration.  
32  
33 16 Aliment Pharmacol Ther. 2004.  
34  
35 17 20. Enaud R, Hooks KB, Barre A, Barnetche T, Hubert C, Massot M, et al. 2019, 8, 645. J Clin  
36  
37 18 Med. 2019;8:645. doi:10.3390/jcm8050645.  
38  
39 19 21. Brennan GT, Saif MW. Pancreatic Enzyme Replacement Therapy: A Concise Review.  
40  
41 20 22. Rumman N, El-Chammas K, Goh V, Salzman N, Quintero D, Werlin S. Calprotectin in Cystic  
42  
43 21 Fibrosis. 2014. doi:10.1186/1471-2431-14-133.  
44  
45 22 23. Dumoulin EN, Van Biervliet S, Delanghe JR. Trypsin is a Potential Confounder in  
46  
47 23 Calprotectin Results. J Pediatr Gastroenterol Nutr. 2015;61:e19.  
48  
49 24 doi:10.1097/MPG.0000000000000906.  
50  
51 25 24. Stagi S, Tam RY, Van Dorst JM, Mckay I, Coffey M, Ooi CY. Clinical Medicine Intestinal  
52  
53 26 Inflammation and Alterations in the Gut Microbiota in Cystic Fibrosis: A Review of the Current  
54  
55  
56  
57  
58  
59  
60

1  
2  
3  
4  
5  
6  
7  
8  
9  
10  
11  
12  
13  
14  
15  
16  
17  
18  
19  
20  
21  
22  
23  
24  
25  
26  
27  
28  
29  
30  
31  
32  
33  
34  
35  
36  
37  
38  
39  
40  
41  
42  
43  
44  
45  
46  
47  
48  
49  
50  
51  
52  
53  
54  
55  
56  
57  
58  
59  
60

- 1 Evidence, Pathophysiology and Future Directions. *J Clin Med.* 2022;2022:649.
- 2 25. Ahmed N, Corey M, Forstner G, Zielenski J, Tsui LC, Ellis L, et al. Molecular consequences of
- 3 cystic fibrosis transmembrane regulator (CFTR) gene mutations in the exocrine pancreas. *Gut.*
- 4 2003;52:1159–64.
- 5 26. Koninckx CR, Donat E, Benninga MA, Broekaert IJ, Gottrand F, Kolho KL, et al. The Use of
- 6 Fecal Calprotectin Testing in Paediatric Disorders: A Position Paper of the European Society for
- 7 Paediatric Gastroenterology and Nutrition Gastroenterology Committee. *J Pediatr*
- 8 *Gastroenterol Nutr.* 2021;72:617–40.
- 9 27. Parisi GF, Papale M, Rotolo N, Aloisio D, Tardino L, Scuderi MG, et al. Severe disease in
- 10 Cystic Fibrosis and fecal calprotectin levels. *Immunobiology.* 2017;222:582–6.
- 11 28. Więcek S, Woś H, Kordys-Darmolińska B, Sankiewicz-Szkółka M, Grzybowska-Chlebowczyk
- 12 U. The concentration of calprotectin in the stools of children with diagnosed cystic fibrosis.
- 13 *Gastroenterol Rev.* 2017;12:38–43.
- 14 29. Garg M, Leach ST, Coffey MJ, Katz T, Strachan R, Pang T, et al. Age-dependent variation of
- 15 fecal calprotectin in cystic fibrosis and healthy children. *J Cyst Fibros.* 2017;16:631–6.
- 16 doi:10.1016/j.jcf.2017.03.010.
- 17 30. Neutra MR, Trier JS. Rectal Mucosa in Cystic Fibrosis: Morphological features before and
- 18 after short term organ culture. *Gastroenterology.* 1978.

**Table 1. Genotype, body mass index, gastrointestinal symptoms, fecal calprotectin and rectal histology of patients with cystic fibrosis.**

| no. | Genotype          | BMI z-score<br>kg/m <sup>2</sup> | Pancreatic<br>function | Abdominal<br>pain | Diarrhea | Constipation | Calprotectin<br>(µg/g) | Histology    |
|-----|-------------------|----------------------------------|------------------------|-------------------|----------|--------------|------------------------|--------------|
| 1   | F508del/R334W     | -0,42                            | PS                     | yes               | no       | no           | 19                     | normal       |
| 2   | F508del/R334W     | 1,18                             | PS                     | no                | no       | no           | 15                     | normal       |
| 3   | F508del/R334W     | 0,94                             | PS                     | yes               | no       | yes          | 79                     | normal       |
| 4   | F508del/711+1G-T  | -0,74                            | PI                     | no                | no       | yes          | 9                      | normal       |
| 5   | F508del/711+1G-T  | -1,99                            | PI                     | no                | no       | no           | 19                     | normal       |
| 6   | F508del/2184insA  | -4,95                            | PI                     | yes               | yes      | no           | 45                     | normal       |
| 7   | F508del/c.3321dup | -0,22                            | PI                     | no                | no       | no           | 341                    | inflammation |
| 8   | F508del/P5L       | -0,3                             | PS                     | no                | no       | no           | 40                     | normal       |
| 9   | F508del/F508del   | -2,37                            | PI                     | no                | no       | no           | 223                    | inflammation |
| 10  | F508del/F508del   | -2,6                             | PI                     | no                | no       | no           | 62                     | inflammation |
| 11  | F508del/F508del   | -0,3                             | PI                     | yes               | no       | yes          | 63                     | inflammation |
| 12  | F508del/F508del   | -0,64                            | PI                     | no                | no       | no           | 55                     | -            |
| 13  | F508del/F508del   | 0,3                              | PI                     | no                | no       | no           | 90                     | -            |
| 14  | F508del/F508del   | 0,1                              | PI                     | no                | no       | no           | 352                    | -            |
| 15  | F508del/F508del   | -0,27                            | PI                     | no                | yes      | no           | 347                    | -            |
| 16  | F508del/F508del   | -0,13                            | PI                     | no                | no       | no           | 116                    | -            |
| 17  | F508del/F508del   | 0,1                              | PI                     | no                | no       | no           | 101                    | -            |
| 18  | F508del/F508del   | 0,55                             | PI                     | yes               | yes      | no           | 104                    | -            |
| 19  | F508del/F508del   | 1,42                             | PI                     | no                | no       | no           | 88                     | -            |
| 20  | F508del/F508del   | -1,16                            | PI                     | no                | no       | no           | 142                    | -            |
| 21  | F508del/F508del   | 0,03                             | PI                     | no                | no       | no           | 55                     | -            |
| 22  | F508del/F508del   | 1,1                              | PI                     | no                | no       | no           | 330                    | -            |
| 23  | F508del/F508del   | 1,2                              | PI                     | no                | no       | no           | 289                    | -            |

BMI – Body mass index; m- months; PI – pancreatic insufficiency; PS-pancreatic sufficiency

**Table 2. Association between gastrointestinal symptoms and meconium ileus past history and normal or elevated fecal calprotectin.**

| n=23           | Normal calprotectin<br>(n=6) |    | Elevated calprotectin<br>(n=17) |    | p-value# |
|----------------|------------------------------|----|---------------------------------|----|----------|
|                | yes                          | no | yes                             | no |          |
| Abdominal pain | 2                            | 4  | 3                               | 14 | 0.58     |
| Diarrhea       | 0                            | 6  | 3                               | 14 | 1        |
| Constipation   | 2                            | 4  | 1                               | 16 | 1        |
| Meconium ileus | 1                            | 5  | 4                               | 13 | 1        |

#Fisher exact test

**Table 3. Comparison of histologic rectal inflammation presence between patients with normal or elevated fecal calprotectin.**

| (n=11)               | Normal calprotectin<br>n=6 |    | Elevated calprotectin<br>n=5 |    |
|----------------------|----------------------------|----|------------------------------|----|
|                      | yes                        | no | yes                          | no |
| Mucosal inflammation | 0                          | 6  | 4                            | 1  |

#Fisher exact test p-value=0.015

**Figure 1 – A** - Histologic features of patient 8 (F508del/c.3321dup) showing mild to moderate focal inflammation, composed of plasma cells and small lymphocytes, in the mucosa, H&E 200x. **B** - Histologic features of patient 9 (F508del/F508del) showing mild focal inflammation of mononucleated cells of the mucosa in a vaguely nodular pattern (blue arrow), H&E 40x; **C** - Histologic features of patient 10 (F508del/F508del) showing mild focal inflammation of the mucosa, with small lymphocytes and plasma cells, between colonic crypts (blue arrow), H&E 40x, highlighted in higher magnification **D**, H&E 200x.

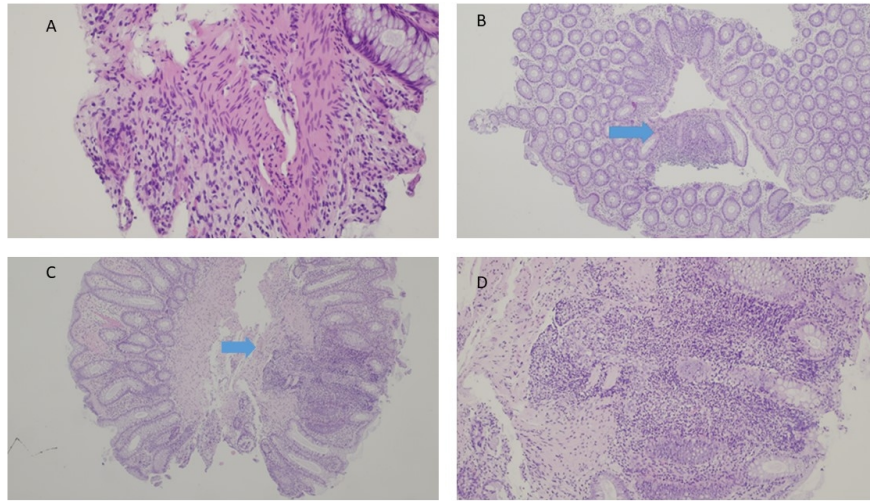

338x190mm (96 x 96 DPI)
